# Supplementary material for: Existential distress in patients with advanced cancer and their caregivers: study protocol of a longitudinal cohort study
Source: PubMed Central journal article supplement — BMJ Open. 2021 Apr 24;11(4):e046351. doi: 10.1136/bmjopen-2020-046351 (PMC8074557; doi:10.1136/bmjopen-2020-046351), 2021-04-24
Supplement: bmjopen-2020-046351.draft_revisions.pdf [file bmjopen-2020-046351.draft_revisions.pdf]

# BMJ Open

BMJ Open is committed to open peer review. As part of this commitment we make the peer review history of every article we publish publicly available.

When an article is published we post the peer reviewers' comments and the authors' responses online. We also post the versions of the paper that were used during peer review. These are the versions that the peer review comments apply to.

The versions of the paper that follow are the versions that were submitted during the peer review process. They are not the versions of record or the final published versions. They should not be cited or distributed as the published version of this manuscript.

BMJ Open is an open access journal and the full, final, typeset and author-corrected version of record of the manuscript is available on our site with no access controls, subscription charges or pay-per-view fees (<http://bmjopen.bmj.com>).

If you have any questions on BMJ Open's open peer review process please email [info.bmjopen@bmj.com](mailto:info.bmjopen@bmj.com)

# BMJ Open

## Existential distress in patients with advanced cancer and their caregivers: Study protocol of a longitudinal cohort study

|                               |                                                                                                                                                                                                                                                                                                                                                                                                                                                                                                 |
|-------------------------------|-------------------------------------------------------------------------------------------------------------------------------------------------------------------------------------------------------------------------------------------------------------------------------------------------------------------------------------------------------------------------------------------------------------------------------------------------------------------------------------------------|
| Journal:                      | <i>BMJ Open</i>                                                                                                                                                                                                                                                                                                                                                                                                                                                                                 |
| Manuscript ID                 | bmjopen-2020-046351                                                                                                                                                                                                                                                                                                                                                                                                                                                                             |
| Article Type:                 | Protocol                                                                                                                                                                                                                                                                                                                                                                                                                                                                                        |
| Date Submitted by the Author: | 28-Oct-2020                                                                                                                                                                                                                                                                                                                                                                                                                                                                                     |
| Complete List of Authors:     | Philipp, Rebecca; University Medical Center Hamburg-Eppendorf, Kalender, Anna; University Medical Center Hamburg-Eppendorf Härter, Martin; Universitäts Klinikum Hamburg-Eppendorf, Bokemeyer, C; University Medical Center Hamburg-Eppendorf Oechsle, Karin; University Medical Center Hamburg-Eppendorf, Department of Oncology, Hematology and BMT, Palliative Care Unit Koch, Uwe; University Medical Center Hamburg-Eppendorf Vehling, Sigrun; University Medical Center Hamburg-Eppendorf |
| Keywords:                     | Adult palliative care < PALLIATIVE CARE, Suicide & self-harm < PSYCHIATRY, MENTAL HEALTH                                                                                                                                                                                                                                                                                                                                                                                                        |
|                               |                                                                                                                                                                                                                                                                                                                                                                                                                                                                                                 |

SCHOLARONE™  
Manuscripts

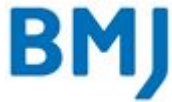

I, the Submitting Author has the right to grant and does grant on behalf of all authors of the Work (as defined in the below author licence), an exclusive licence and/or a non-exclusive licence for contributions from authors who are: i) UK Crown employees; ii) where BMJ has agreed a CC-BY licence shall apply, and/or iii) in accordance with the terms applicable for US Federal Government officers or employees acting as part of their official duties; on a worldwide, perpetual, irrevocable, royalty-free basis to BMJ Publishing Group Ltd ("BMJ") its licensees and where the relevant Journal is co-owned by BMJ to the co-owners of the Journal, to publish the Work in this journal and any other BMJ products and to exploit all rights, as set out in our [licence](#).

The Submitting Author accepts and understands that any supply made under these terms is made by BMJ to the Submitting Author unless you are acting as an employee on behalf of your employer or a postgraduate student of an affiliated institution which is paying any applicable article publishing charge ("APC") for Open Access articles. Where the Submitting Author wishes to make the Work available on an Open Access basis (and intends to pay the relevant APC), the terms of reuse of such Open Access shall be governed by a Creative Commons licence – details of these licences and which [Creative Commons](#) licence will apply to this Work are set out in our licence referred to above.

Other than as permitted in any relevant BMJ Author's Self Archiving Policies, I confirm this Work has not been accepted for publication elsewhere, is not being considered for publication elsewhere and does not duplicate material already published. I confirm all authors consent to publication of this Work and authorise the granting of this licence.

1  
2  
3 **Authors** Rebecca Philipp, MSc,<sup>1</sup> Anna Kalender, MSc,<sup>1,2</sup> Martin Härter, MD, PhD<sup>1</sup>  
4 Carsten Bokemeyer, MD,<sup>2</sup> Karin Oechsle, MD,<sup>3</sup> Uwe Koch, MD, PhD<sup>1</sup>, Sigrun  
5 Vehling, PhD<sup>1,2</sup>  
6  
7  
8  
9

10  
11 **Title** Existential distress in patients with advanced cancer and their caregivers:  
12 Study protocol of a longitudinal cohort study  
13  
14  
15

16  
17 **Article type** Original article  
18  
19

20  
21 **Affiliations and addresses**  
22

23 <sup>1</sup>University Medical Center Hamburg-Eppendorf, Department of Medical Psychology, Martinistrasse 52  
24 - W26, 20246 Hamburg, Germany  
25  
26

27 <sup>2</sup>Department of Oncology, Hematology, and Bone Marrow Transplantation with Section of  
28 Pneumology, University Medical Center Hamburg-Eppendorf, Hamburg, Germany  
29  
30

31 <sup>3</sup>Palliative Care Unit, Department of Oncology, Hematology, and Bone Marrow Transplantation with  
32 Section of Pneumology, University Medical Center Hamburg-Eppendorf, Hamburg, Germany  
33  
34

35 **Corresponding author**  
36

37 Rebecca Philipp, Phone +49 40 7410 56203, Fax +49 40 7410 54940, e-Mail r.philipp@uke.de  
38  
39  
40

41 **ORCID**  
42

43 Rebecca Philipp 0000-0002-1875-3823  
44

45 Martin Härter 0000-0001-7443-9890  
46

47 Carsten Bokemeyer 0000-0001-6071-7810  
48

49 Karin Oechsle 0000-0002-5183-641X  
50

51 Sigrun Vehling 0000-0001-9314-4326  
52  
53  
54  
55  
56  
57  
58  
59  
60

## Abstract

### Introduction

At the end of life, patients with advanced cancer and their informal caregivers may be confronted with many existential concerns. Despite the strong potential to alleviate existential distress through psychosocial interventions, existential distress and its impact on health care outcomes have not yet been studied systematically. We aim to investigate frequency, longitudinal trajectory and predictive impact of existential distress on relevant end-of-life outcomes. We further aim to determine patients' and caregivers' specific need for and utilization of psychosocial support.

### Methods and Analysis

In this longitudinal cohort study we will consecutively recruit adult patients with advanced cancer and their caregivers from outpatient and inpatient clinics. Over a period of 12 months, participants will complete self-report questionnaires at five points of assessment (sociodemographic and disease-related characteristics, existential distress, end-of-life outcomes, resources and support needs). At baseline and after six months, we will also conduct structured diagnostic interviews to assess mental disorders. Statistical analyses will include descriptive statistics to determine prevalence of existential distress, mental disorders and end-of-life outcomes; multiple linear and logistic regression analyses to calculate the predictive impact of existential distress on end-of-life outcomes; and growth mixture models to analyze longitudinal trajectories of existential distress.

### Ethics and dissemination

All procedures performed in this study were in accordance with the ethical standards of the institutional and/or national research committee and with the 1964 Helsinki Declaration and its later amendments or comparable ethical standards. Results of this study will be presented at scientific conferences and published in peer-reviewed journals. Other forms of dissemination will include sharing results on the psychometric properties of the structured demoralization interview with international research groups and communication with health care professionals providing psychosocial treatment for patients and caregivers. Following scientific standards, our progress will be regularly updated on [clinicaltrials.gov](http://clinicaltrials.gov).

### Study registration

NCT04600206

### Strengths and limitations of this study

- longitudinal empirical data will allow for conclusions concerning frequency, persistence and course of existential distress throughout one year

- recruitment strategy includes enrolling a large, heterogeneous sample of patients with advanced cancer providing representative findings for a German healthcare setting
- profiles of existential distress can be applied by clinicians from multiple professions and may help to address these concerns easily and effectively in fast moving healthcare settings
- assessment of an extensive battery of instruments in highly distressed sample
- potentially high dropout rates due to patients' physical decline or death within the study period

### Keywords

Advanced cancer, caregivers, death anxiety, demoralization, existential distress, longitudinal, mental disorders, palliative care, suicidal ideation and behavior

## Introduction

In Germany, more than 230,000 individuals die from cancer each year. Due to an aging population and improvement in life-prolonging anticancer treatments, the number of patients and caregivers who face the existential consequences of living with advanced incurable cancer will strongly increase over the next years.<sup>1,2</sup> In about one third of the patients, multiple sources of distress lead to increased levels of depression, anxiety, and substantial physical symptom burden.<sup>3-5</sup> Informal caregivers are confronted with often conflicting demands of caring for a severely ill loved one and maintaining a focus on their own needs, resulting in high levels of psychological distress.<sup>6-9</sup> Although the existential domain of suffering has long been incorporated into a bio-psycho-social existential perspective in advanced cancer and palliative care,<sup>10-12</sup> existential distress has received little attention in systematic quantitative or prospective research in these populations.

Existential distress refers to a distinct domain of cancer-related distress. It may occur alongside other forms of distress, but can also arise independently, even when physical pain is treated, social support is available and no psychological disorder is present.<sup>13,14</sup> Due to the fundamental losses and changes advanced cancer can cause, emotional pain and despair may be experienced as "existential", similar to the distress described by existential philosophers, which arises from the finitude of life and the ramifications of existence.<sup>15</sup> Based on earlier reviews and conceptual literature,<sup>15-21</sup> we propose a taxonomy which integrates different expressions of existential concerns among patients and caregivers (Figure 1). Here, patients' and caregivers' existential distress is characterized as a fear of what will happen at death, uncertainty and unpreparedness, a sense of being a burden to others, a sense of profound loneliness, pointlessness, a violated sense of dignity, and grief about missed opportunities in life.

Operationalizations of existential distress<sup>22</sup> in cancer patients include, among other, demoralization<sup>23</sup>, death anxiety<sup>24,25</sup>, and dignity-related concerns<sup>26</sup> (Figure 1). Demoralization is defined by lowered morale and a perceived incapacity to cope that can become associated with a sense of helplessness and failure and a loss of self-worth, hope, and meaning in life. Current systematic reviews indicate that 20% of patients with advanced cancer experience demoralization.<sup>27,28</sup> Death anxiety refers to distress due to a shortened life expectancy, fears about uncontrollable suffering, worry about the impact of one's death on others and regret about missed opportunities in life.<sup>24,25</sup> A study in 382 outpatients with advanced cancer found significant death anxiety in 27% of the study participants.<sup>29</sup> Dignity-related concerns, such as perceived burdensomeness, were reported by up to 23% of the patients,<sup>30,31</sup> while 8% experienced a significantly impaired sense of dignity.<sup>26</sup> Other related categories of existential

1  
2  
3 concerns include unpreparedness at the end of life (31%)<sup>32</sup>, loss of control (16%), isolation (22%),  
4 uncompleted life tasks (7%) and loss of continuity (loss of role, loss of enjoyable activity and loss of  
5 being oneself) (10%)<sup>33</sup>.  
6  
7  
8  
9

10 Especially spouses of cancer patients may experience identity-related existential concerns (20%)<sup>34</sup>. This  
11 may include role strain through the adoption of the caregiver-role and the associated changes in the  
12 relationship.<sup>35</sup> Caregivers may experience a change in their identity as a result of the extensive impact  
13 this often highly time-consuming function has on everyday life and the exertion of other important  
14 roles.<sup>35-37</sup> They may also suffer from the loss of the patient's identity, which is a frequent consequence  
15 of brain tumors.<sup>38</sup>  
16  
17  
18  
19  
20  
21  
22

23 However, to date there is only limited research about the occurrence of existential distress in  
24 caregivers. While both, patients and caregivers, may be affected by demoralization and death anxiety,  
25 caregivers also face unique existential concerns including guilt, anticipatory grief<sup>6,39</sup> or despair about  
26 how to go on after their partner's death.<sup>40</sup> They often feel incompetent and unprepared for the task  
27 of caring for a loved one, which may lead to feelings of insufficiency and guilt for not providing  
28 appropriate care.<sup>41</sup> At the same time, caregivers often experience the pressure of maintaining hope  
29 and a positive attitude, preventing them from discussing own concerns.<sup>42</sup> Given this double challenge,  
30 caregivers may feel isolated and lonely. Whereas some couples manage to renegotiate roles and find  
31 ways to communicate about these issues, patients also tend to feel alienated by their caregivers' denial  
32 and avoidance of conflict.<sup>43</sup> Difficulties in coping with existential concerns has been associated with  
33 complicated grief.<sup>44,45</sup> Yet, there is a clear need for research on how caregivers may be affected by  
34 patients' existential distress and their own existential fears and hopelessness.<sup>46</sup> Especially because a  
35 lack of perceived relatedness in close relationships is a common source of existential distress for both,  
36 patients and caregivers.<sup>47</sup>  
37  
38  
39  
40  
41  
42  
43  
44  
45  
46  
47  
48  
49

50 Cross-sectional studies do not only suggest a positive association between demoralization and an  
51 increased risk for adjustment, depressive and anxiety disorders, they also found positive associations  
52 between existential distress and suicidal ideation or the desire for hastened death.<sup>48-50</sup> Also, in the  
53 context of legalizing physician-assisted suicide in Canada, Li et al.<sup>51</sup> observed existential distress to be  
54 an important motive for these requests. A rare longitudinal study found an increase of existential  
55 distress over time.<sup>52</sup> Moreover, existential issues may contribute to receiving aggressive treatments in  
56 the last weeks of life.<sup>53,54</sup> Studies also indicate a positive relationship of religious coping and aggressive  
57  
58  
59  
60



1  
2  
3 treatment at the end of life.<sup>55,56</sup> It is possible that existential distress is linked to a form of coping, which  
4 interferes with prognostic awareness and timely end-of-life discussions. Yet, the role of death anxiety,  
5 lack of preparedness, a strong hope for cure, and incongruence of patient and caregiver acceptance is  
6 currently unclear.<sup>57</sup>  
7  
8  
9

10  
11  
12 Early palliative care interventions may respond to existential distress by increasing the use of  
13 approach-oriented coping,<sup>58</sup> which includes the acceptance of a difficult situation. The adoption of an  
14 upright, positive attitude toward unchangeable facts (e.g. incurable cancer) has been described as one  
15 possibility to discover meaning in life,<sup>59</sup> which in turn is associated with improved mental and physical  
16 health.<sup>60</sup> In contrast, a crisis of meaning has been shown to mediate the association between a stressor  
17 and health outcomes.<sup>61</sup> Although the importance of perceived meaning in life to the social and physical  
18 functioning, the psychosocial adaption and the experience of existential distress in cancer patients has  
19 thus been described in several studies,<sup>60,62,63</sup> little is known about the underlying mechanism that  
20 enables humans to find meaning in light of severe suffering.  
21  
22  
23  
24  
25  
26  
27  
28  
29

### 30 **Objectives**

31  
32 Existential distress may have profound consequences for health care outcomes of patients and their  
33 caregivers at the end of life. Despite their strong potential for alleviation through psychosocial  
34 interventions, clinicians struggle to recognize and address existential concerns.<sup>64,65</sup> In the shadow of  
35 prominent debates about autonomy at the end of life, research has fallen short of understanding the  
36 multifaceted factors that underlie existential distress. Due to the lack of systematic longitudinal  
37 studies, there is limited knowledge about the occurrence of existential distress, how it evolves over  
38 time, and its prospective impact on important end-of-life outcomes. Moreover, it is of substantial  
39 clinical relevance to assess caregivers' existential issues quantitatively, which have been mostly  
40 observed in qualitative research so far.  
41  
42  
43  
44  
45  
46  
47  
48  
49

50 This study will systematically assess existential distress and investigate its impact on patient- and  
51 caregiver-relevant outcomes at the end of life. Therefore, we aim  
52  
53

- 54 1) to investigate the frequency, longitudinal trajectory and predictive impact of existential  
55 distress on patient- and caregiver-relevant end-of-life outcomes,
- 56 2) to determine patients' and caregivers' specific need for and utilization of psychosocial support  
57 with respect to existential concerns, and
- 58 3) to explore typical profiles of existential distress in patients and their caregivers.  
59  
60

## Methods and analysis

### *Study design*

Starting October 2020, we will conduct a longitudinal cohort study over a period of 12 months. This study period includes five points of assessment at baseline (T1), 3 months (T2), 6 months (T3), 9 months (T4) and 12 months (T5). The study was registered on [clinicaltrials.gov](https://clinicaltrials.gov/ct2/show/study/NCT04600206): NCT04600206.

### *Participants and recruitment*

We will consecutively recruit patients and their informal caregivers from outpatient and inpatient clinics of the University Cancer Center Hamburg and affiliated clinics. Eligible patients are at least 18 years old and are diagnosed with advanced cancer as defined by Union for International Cancer Control (UICC) stage IV solid tumor or stage III lung or ovarian tumor. Eligible caregivers (spouse or partner, any family member or friend) are at least 18 years old and care for a relative who is diagnosed with advanced cancer. Assessment will include patients with advanced cancer and their caregivers across all phases of advanced disease from diagnosis to terminal stages to reflect a cross-section of treatment settings, tumor entities, and time since diagnosis. Exclusion criteria for patients and caregivers are severe cognitive or physical impairment and insufficient ability to speak German to give informed consent and to complete the self-report questionnaires.

### *Procedures*

We will obtain written informed consent from patients and caregivers prior to participation. Participants may withdraw informed consent at all times without being subject to any disadvantages. Patients and caregivers will complete paper-pencil self-report questionnaires to measure existential distress and respective support needs at each point of assessment. At baseline (T1) and after 6 months (T3), we will conduct structured diagnostic interviews face-to-face or via telephone to assess mental disorders. We will assess sociodemographic characteristics of patients and caregivers (age, gender, education, and socioeconomic data) using a standardized self-report questionnaire. We will extract disease and medical care-related characteristics (tumor entity, tumor stage, time since diagnosis and anticancer and psychopharmacological treatments) from patients' medical charts. We will further review patients' medical charts regularly for record of deceased patients and extraction of medical care data. For post-bereavement assessment, we will approach caregivers of deceased patients 3 months after a patient's death. We will conduct follow-up assessments via mail, telephone or upon

1  
2  
3 patients' and caregivers' appointments for medical treatment at the cancer centers. For non-responder  
4 analyses, we will collect basic demographic and medical data from non-participants on a voluntary  
5 basis.  
6  
7  
8  
9

## 10 **Measures**

11  
12 Table 1 shows self-report questionnaires and observer-rated instruments that will be completed by  
13 patients, caregivers or both.  
14  
15

### 16 *Existential distress*

17  
18 We will assess *demoralization*<sup>23</sup> in patients and caregivers using the *Demoralization Scale-II (DS-II)*.<sup>66,67</sup>  
19 The 16-item revised scale measures feelings of hopelessness and helplessness, and loss of meaning  
20 and purpose on two subscales (Meaning and Purpose, Distress and Coping Ability). Items are scored  
21 on a 3-point Likert-scale ranging from 0 (never) to 2 (often). Sum scores range from 0 to 32 for the  
22 total scale and from 0 to 16 for the subscales. The subscales and the total scale (Cronbach's  $\alpha = 0.89$ )  
23 show good internal consistency.<sup>67</sup> The original scale<sup>68</sup> was validated in German cancer patients and  
24 showed good internal consistency (Cronbach's  $\alpha = 0.84$ ).<sup>69</sup>  
25  
26  
27  
28  
29  
30  
31  
32  
33  
34  
35

36 We will assess *death anxiety* for patients and caregivers using the *Death and Dying Distress Scale*  
37 (*DADDS*).<sup>24,25</sup> The 15-item scale measures clinically significant distress with regard to concerns  
38 surrounding the patient's death. This includes psychosocial and existential concerns about missed  
39 opportunities and the loss of time, past regrets and uncertainty about the future and the burden of  
40 death on others. It also measures practical concerns about the process of dying, including fears about  
41 dying alone or with suffering or worries about its timing. Items are scored on a 6-point Likert-scale  
42 ranging from 0 (no distress) to 5 (extreme distress). The sum score ranges from 0 to 75. High scores  
43 indicate high death anxiety. A modified version of the scale validated in German cancer patients  
44 showed excellent internal consistency (Cronbach's  $\alpha = 0.91$ ).<sup>70</sup> The version for informal caregivers (C.  
45 Lo, personal communication, May 2020) includes a question asking for the caregiver's relationship with  
46 the patient (spouse or partner, child, sibling, parent or guardian, other family member or friend).  
47  
48  
49  
50  
51  
52  
53  
54  
55  
56

57 We will assess *perceived relatedness* for patients and caregivers using the subscales *Dependence and*  
58 *Relatedness of the Depressive Experiences Questionnaire (DEQ)*.<sup>71,72</sup> The 18- and 8-item scales are  
59 distinct aspects of an overall Dependency factor. They measure interpersonal issues like feelings of  
60

1  
2  
3 helplessness, fear of rejection, and feelings of loneliness due to disruption in a relationship.<sup>72</sup> Items are  
4 scored on a 7-point Likert-scale ranging from 1 (disagree) to 7 (agree). According to the procedure  
5 described by Blatt et al.,<sup>73</sup> we calculate scores based on the factor scores derived from a confirmatory  
6 factor analysis. The authors provided us with a syntax for SPSS (D. Zuroff, personal communication,  
7 May 2020). The validated German version<sup>74</sup> showed acceptable to good internal consistency  
8 (Cronbach's  $\alpha = 0.74$  to  $0.83$ ).<sup>75</sup>  
9  
10  
11  
12  
13

14  
15  
16 We will assess *loss orientation and life engagement* in patients and caregivers using the *Revised Loss*  
17 *Orientation and Life Engagement in Advanced Cancer Scale (LOLES)*.<sup>76</sup> The 20-item scale measures  
18 preoccupation with death and dying, engagement in personally meaningful activities, and coping  
19 efforts including end-of-life preparation, distraction and hoping for a positive outcome. Items are  
20 scored on a 5-point Likert-scale ranging from 0 (not at all) to 4 (nearly all the time). High scores indicate  
21 high levels of loss orientation, life engagement, and coping efforts, respectively. The pilot version of  
22 the scale showed good internal consistency (Cronbach's  $\alpha = 0.80$  to  $0.88$ ).  
23  
24  
25  
26  
27  
28  
29

30 We will assess *dignity-related concerns* in patients using the *Sense of Dignity Item (SDI)*.<sup>26,77</sup> The item  
31 measures the loss of dignity on a 7-point Likert-scale ranging from 0 (no sense of loss of dignity) to 6  
32 (extreme sense of loss of dignity). A score  $> 3$  indicates a fractured sense of dignity. Further, we will  
33 assess dignity-related and *identity-related concerns* using the *Patient Dignity Inventory (PDI)*.<sup>78</sup> The 25-  
34 item scale measures the loss of sense of dignity in patients with terminal illness. For our purposes, we  
35 will only use the subscales assessing physical symptom distress and body image and loss of autonomy,  
36 according to the validated German version.<sup>79</sup> Items are scored on a 5-point Likert-scale ranging from 1  
37 (not a problem) to 5 (overwhelming problem). Scores  $\geq 3$  indicate that a relevant problem is  
38 experienced. The German version of the scale showed excellent internal consistency (Cronbach's  
39  $\alpha = 0.96$ ).<sup>79</sup>  
40  
41  
42  
43  
44  
45  
46  
47  
48  
49

50 We will assess *anticipatory grief* in caregivers using the short version of the *Marwit–Meuser Caregiver*  
51 *Grief Inventory (MM-CGI-SF)*.<sup>80</sup> The 18-item scale measures pre-death grief on the subscales Personal  
52 Sacrifice and Burden, Heartfelt Sadness and Longing, and Worry and Felt Isolation. Items are scored on  
53 a 5-point Likert-scale ranging from 1 (strongly disagree) to 5 (strongly agree). Three items, which  
54 referred to aspects specific to dementia, were adapted to cancer populations (S. Marwit, personal  
55 communication, June 2020). The total sum score ranges from 0 to 90. High scores indicate a higher  
56 level of grief level. Originally developed for caregivers of patients with Alzheimer's disease, its  
57  
58  
59  
60

1  
2  
3 psychometric properties have been confirmed among caregivers of patients with cancer. The total  
4 scale and the subscales showed good to excellent internal consistency (Cronbach's  $\alpha = 0.80$  to  $0.90$ ).  
5  
6  
7

8  
9 We will assess *guilt* in caregivers using the *Caregiver Guilt Questionnaire (CGQ)*.<sup>81</sup> The 22-item scale  
10 measures aspects of guilt experienced by caregivers on the subscales *Guilt about doing wrong by the*  
11 *care recipient*, *Guilt about not rising to the occasion as caregivers*, *Guilt about self-care*, *Guilt about*  
12 *neglecting other relatives*, and *Guilt about having negative feelings towards other people*. Items are  
13 scored on a 5-point Likert-scale ranging from 0 (never) to 4 (always or most always). The total sum  
14 score ranges from 0 to 88. High scores indicate greater guilt. The total scale and the subscales showed  
15 acceptable to good internal consistency (Cronbach's  $\alpha = 0.63$  to  $0.89$ ).  
16  
17  
18  
19  
20  
21  
22

### 23 *End-of-life outcomes and prevalence of mental disorders*

24 Information about *aggressiveness of care* including receipt of chemotherapy in the last two weeks of  
25 life, emergency hospital admissions or intensive-care treatment during the last month of life<sup>82</sup> will be  
26 obtained from medical chart reviews for deceased patients. Further, we will document the  
27 involvement of specialized palliative care services or hospice services.  
28  
29  
30  
31  
32  
33  
34

35 We will assess the prevalence of *affective and anxiety disorders* in patients and caregivers using the  
36 *Structured Clinical Interview for DSM-5 (SCID-5)*.<sup>83</sup> The semi-structured clinical interview measures  
37 mental disorders according to the DSM-5.<sup>84</sup> The German version showed acceptable internal  
38 consistency (Cronbach's  $\alpha \geq 0.70$ ).<sup>85</sup>  
39  
40  
41  
42  
43  
44

45 We will assess the prevalence of *adjustment disorders* in patients and caregivers using the new  
46 *Adjustment Disorder Module of the Composite International Diagnostic Interview (CIDI)*.<sup>86</sup> The  
47 structured interview measures the disorder according to the International Classification of Diseases  
48 (ICD-11).<sup>87</sup> If participants name one or more stressful events during the past 12 months, they are asked  
49 about accompanying symptoms, duration of symptoms and impairments in their professional or social  
50 life. The diagnosis will be determined according to the criteria described by Perkonigg and colleagues.<sup>86</sup>  
51  
52  
53  
54  
55  
56

57 We will assess the *desire for hastened death* in patients using the short form of the *Schedule of*  
58 *Attitudes Toward Hastened Death (SAHD-A)*.<sup>88</sup> The 6-item version of the original instrument<sup>89</sup>  
59 measures a wish to die sooner than might occur by natural disease. Items are scored with either being  
60

1  
2  
3 true (1) or false (0). For the total score, we count the number of endorsed items, ranging from 0 to 6.  
4 High scores indicate high levels of desire for hastened death. We selected the six relevant items out of  
5 the validated German version (SAHD-D).<sup>90</sup> The short version showed good internal consistency  
6 (Cronbach's  $\alpha = 0.83$ ).<sup>88</sup>  
7  
8  
9

10  
11  
12 We will assess *suicidal ideation* in patients and caregivers using the *Beck Scale for Suicidal Ideation*  
13 (*BSS*).<sup>91,92</sup> The 21-item scale measures the intensity of suicidal tendencies with three statements for  
14 each item (e.g., 0 = I have a moderate to strong wish to live, 1 = I have a weak wish to live, 2 = I have  
15 no wish to live). The first five items can be used to screen for suicidal ideation. If items 4 and 5,  
16 measuring active and passive suicidal ideation, are scored with 0, participants are asked to skip to the  
17 items regarding previous suicidal attempts. The sum score ranges from 0 to 38 for the total scale and  
18 from 0 to 10 for the screening score. Higher values indicate stronger suicidal tendencies. The German  
19 version showed high internal consistency for the screening items (Cronbach's  $\alpha = 0.89$ ) and the total  
20 scale (Cronbach's  $\alpha = 0.88$ ).<sup>92</sup>  
21  
22  
23  
24  
25  
26  
27  
28  
29

30 We will assess *coping and demoralization* in patients and caregivers using the *Structured Interview for*  
31 *Psychological Adjustment and Demoralization* developed by Kissane and colleagues (Bobevski. I. &  
32 Kissane, D., 2019, Structured Interview for Psychological Adjustment and Demoralisation, unpublished  
33 clinical interview). The 36-item interview measures participants' sense of coping with any stressful  
34 event, including cancer and its treatment, with regard to level of avoidance, symptoms of  
35 demoralization, preoccupation, value of life, and functional impairment. Items can be answered with  
36 yes or no.  
37  
38  
39  
40  
41  
42  
43  
44

45 We will assess *complicated grief* in caregivers after the patient's death using the *Inventory of*  
46 *Complicated Grief (ICG)*.<sup>93</sup> The 19-item scale measures symptoms of complicated grief on based on the  
47 proposed criteria for DSM-5<sup>84</sup> on a single factor. Items are scored on a 5-point Likert-scale ranging from  
48 0 (never) to 4 (always). The sum score ranges from 0 to 76. Scores  $\geq 25$  indicate experiences of  
49 complicated grief. The German version of the scale shows good internal consistency (Cronbach's  
50  $\alpha = 0.87$ ).<sup>94</sup>  
51  
52  
53  
54  
55  
56  
57

58 We will assess the *quality of dying and death* from the caregivers' perspective using the *Quality of*  
59 *Dying and Death Questionnaire (QODD)*.<sup>95</sup> After a patient's death, the questionnaire is usually  
60 administered as an interview, asking caregivers to evaluate the patients' dying experience during their

1  
2  
3 last seven days or last month. In this study, we will administer a short 20-item version<sup>96</sup> as a self-report  
4 instrument. Caregivers indicate how they would rate each experience for the patient on a scale from  
5 0 (terrible experience) to 10 (almost perfect experience). The score is calculated by adding up the  
6 ratings and dividing them by the number of items answered. To obtain a total score between 0 and  
7 100, the result is multiplied by 10. Higher scores indicate a better quality of the dying experience. The  
8 adapted German version showed good internal consistency (Cronbach's  $\alpha = 0.85$ ).<sup>97</sup>  
9  
10  
11  
12  
13  
14

#### 15 *Control variables, resources, and support needs*

16 We will assess *symptom burden* in patients using the *Memorial Symptom Assessment Scale (MSAS-*  
17 *SF)*.<sup>98</sup> The 28-item scale measures the frequency and the distress of physical symptoms that may occur  
18 as a result of cancer or its treatment. Items are scored on a five-point Likert-scale ranging from 0 (not  
19 at all distressed) to 4 (very much distressed). For the total score, we count the number of physical  
20 symptoms reported by the patients. The scale shows good internal consistency (Cronbach's  $\alpha = 0.87$ ).  
21  
22  
23  
24  
25  
26  
27  
28

29 We will assess self-reported symptoms of *depression* and *anxiety* in patients and caregivers using the  
30 *Patient Health Questionnaire (PHQ-9)*<sup>99</sup> and the *Generalized Anxiety Disorder Questionnaire (GAD-7)*<sup>100</sup>.  
31 Both instruments measure symptoms of depression and anxiety based on DSM-5<sup>84</sup> criteria. Items are  
32 scored on a four-point Likert-scale ranging from 0 (not at all) to 3 (nearly every day). Sum scores range  
33 from 0 to 27 and 0 to 21, respectively. Scores  $\geq 10$  indicate moderate, scores  $\geq 15$  severe depression  
34 or anxiety. Both German versions showed good internal consistency (Cronbach's  $\alpha = 0.89$ ).<sup>101,102</sup>  
35  
36  
37  
38  
39  
40  
41

42 We will assess *meaningfulness in life* and *crisis of meaning* in patients and caregivers using the  
43 subscales of the *Sources of Meaning and Meaning in Life Questionnaire (LeBe)*.<sup>103</sup> The 5-item subscales  
44 measure perceived meaningful fulfillment and crisis of meaning. Items are scored on a 6-point Likert-  
45 scale ranging from 0 (totally disagree) to 5 (totally agree). Sum scores for each subscale range from 0  
46 to 25. High scores indicate a greater sense of meaningfulness or a greater lack of meaning, respectively.  
47 Both scales showed acceptable to good internal consistency (Cronbach's  $\alpha = 0.72$  to  $0.87$ ).  
48  
49  
50  
51  
52  
53

54 We will assess the *need for and utilization of psychosocial support* for existential concerns in patients  
55 and caregivers using a standardized self-report questionnaire. It measures whether participants are  
56 still thinking about the existential concerns mentioned in the overall questionnaire, including fear of  
57 death and dying, fear of suffering, sense of pointlessness or hopelessness, sense of loss of dignity,  
58  
59  
60

1  
2  
3 preparation for the end of life, anticipatory grief, and existential loneliness. It will further assess  
4 whether participants wish to receive support dealing with this subject and who would be their  
5 preferred source of support (partner, family, friends, treating physician, psychologist/psychotherapist,  
6 other patients or caregivers). Moreover, participants will be asked whether they have previously  
7 utilized psychosocial support services.  
8  
9  
10

## 11 12 13 14 **Statistical methods**

### 15 16 *Power calculation*

17  
18 To determine the relative risk for a binary end-of-life outcome after 12 months, we base our sample  
19 size calculation on a multiple logistic regression model. The model includes existential distress at  
20 baseline and the covariates age, gender, and socioeconomic status. Because the test statistic in logistic  
21 regression analysis is based on a  $\chi^2$ -distribution, the number of degrees of freedom (df) is equal to the  
22 number of regression weights in the model. Accordingly, we calculate the required sample size to  
23 reliably estimate the model by multiplying the minimum number of observations needed per df  
24 (n = 15) with the number of df (df = 4) and dividing the product by the ratio of positive events expected  
25 for the binary outcomes. To predict receipt of aggressive treatment, we use the mean frequency  
26 reported by the German studies of Dasch et al.<sup>53</sup> (38%) and Radbruch et al.<sup>54</sup> (10%). Thus, we require  
27 a sample of  $n = 250$  ( $n = \frac{15 \times 4}{0.24}$ ) for our analyses at 12-month follow-up. Based on previous experiences,  
28 we expect a drop-out rate of 50% due to death or loss of interest in participation<sup>104</sup> resulting in a  
29 required sample size of n=500 at baseline.  
30  
31  
32  
33  
34  
35  
36  
37  
38  
39  
40

### 41 42 *Statistical analysis*

43  
44 We will calculate descriptive statistics to determine sample and medical characteristics as well as the  
45 prevalence of existential distress, mental disorders and palliative care outcomes. We will estimate  
46 frequencies with 95% confidence intervals. To analyse the impact of existential distress at baseline on  
47 binary and continuous end-of-life and palliative care outcomes after 12 months, we conduct multiple  
48 linear and logistic regression. After testing for multicollinearity, we will control for demographic,  
49 physical and psychosocial variables.  
50  
51  
52  
53  
54

55  
56 We will analyse the longitudinal trajectory of existential distress across the 12-month study period  
57 using growth mixture models. These models estimate distinct groups of existential distress trajectories  
58 based on a structural equation-modelling framework. We will use latent class analysis to explore  
59  
60



1  
2  
3 whether the measured existential concerns form distinct types of existential distress. If more than 5%  
4 of the observed values are missing, we will replace missing data using multiple imputation. To account  
5 for potential bias in the caregiver estimates regarding the occurrence of existential distress, we will  
6 apply weighting procedures to statistically control for differences between patients with and without  
7 participating caregivers. We will perform statistical analyses in SPSS<sup>105</sup> and RStudio with R.<sup>106,107</sup>  
8  
9  
10  
11  
12  
13

#### 14 ***Patient and public involvement***

15  
16 The research questions and outcome measures are based on previous findings on the concerns of  
17 patients with advanced cancer and their caregivers as well as health care outcomes that were found  
18 relevant in this sample. Patients or the public were not involved in the design of the study. Patients  
19 and their caregivers are involved in conducting the study. We will ask them to complete self-report  
20 questionnaires and interviews, in order to answer our research question. We inform patients and  
21 caregivers that they are provided with the final results of the study upon request.  
22  
23  
24  
25  
26  
27  
28

#### 29 **Ethics and dissemination**

30  
31 All procedures performed in this study were in accordance with the ethical standards of the  
32 institutional and/or national research committee and with the 1964 Helsinki Declaration and its later  
33 amendments or comparable ethical standards. The study was approved by the institutional research  
34 ethics committee (Lokale Psychologische Ethikkommission am Zentrum für Psychosoziale Medizin,  
35 LPEK-0177). Informed consent will be obtained from all individual participants included in the study or  
36 their legal guardians.  
37  
38  
39  
40  
41  
42  
43

44 This longitudinal study will provide unique systematic knowledge about patients' and caregivers'  
45 existential concerns. There is a need for quantitative studies focusing explicitly on existential concerns  
46 of caregivers, who in general tend to be overlooked and are also referred to as "hidden patients".<sup>108,109</sup>  
47 Accordingly, results of this study will be presented at scientific conferences and published in peer-  
48 reviewed journals. Other forms of dissemination will include sharing results on the psychometric  
49 properties of the structured demoralization interview with international research groups, in order to  
50 further examine the clinical relevance of using demoralization as a diagnostic category allowing for the  
51 diagnosis and treatment of demoralization alongside depression and adjustment disorder which has  
52 been proposed by Kissane et and colleagues.<sup>110</sup> Our clearly integrated data will contribute to the  
53 recognition of existential distress in these populations and provide the empirical foundation necessary  
54 to develop targeted interventions. In this context dissemination will include communication with  
55  
56  
57  
58  
59  
60

1  
2  
3 health care professionals providing psychosocial treatment for patients and caregivers. Following  
4 scientific standards, our progress will be regularly updated on [clinicaltrials.gov](http://clinicaltrials.gov).  
5  
6  
7  
8  
9  
10  
11  
12  
13  
14  
15  
16  
17  
18  
19  
20  
21  
22  
23  
24  
25  
26  
27  
28  
29  
30  
31  
32  
33  
34  
35  
36  
37  
38  
39  
40  
41  
42  
43  
44  
45  
46  
47  
48  
49  
50  
51  
52  
53  
54  
55  
56  
57  
58  
59  
60

For peer review only

## References

1. Henley SJ, Thomas CC, Lewis DR, Ward EM, Islami F, Wu M *et al*. Annual report to the nation on the status of cancer, part II: Progress toward healthy people 2020 objectives for 4 common cancers. *Cancer*, 2020;126(10): 2250–2266. doi: 10.1002/cncr.32801.
2. Barnes B, Kraywinkel K, Nowossadeck E, Schönfeld I, Starker A, Wienecke A *et al*. *Bericht zum Krebsgeschehen in Deutschland 2016*; 2016. doi: 10.17886/rkipubl-2016-014.
3. Cleeland CS. Symptom burden: Multiple symptoms and their impact as patient-reported outcomes. *J Natl Cancer Inst Monographs*, 2007;37: 16–21. doi: 10.1093/jncimonographs/lgm005.
4. Mehnert A, Brähler E, Faller H, Härter M, Keller M, Schulz H *et al*. Four-week prevalence of mental disorders in patients with cancer across major tumor entities. *J Clin Oncol*, 2014;32(31): 3540–3546. doi: 10.1200/JCO.2014.56.0086.
5. Mitchell AJ, Chan M, Bhatti H, Halton M, Grassi L, Johansen C *et al*. Prevalence of depression, anxiety, and adjustment disorder in oncological, haematological, and palliative-care settings: A meta-analysis of 94 interview-based studies. *Lancet Oncol*, 2011;12(2): 160–174. doi: 10.1016/S1470-2045(11)70002-X.
6. Areia NP, Fonseca G, Major S, Relvas AP. Psychological morbidity in family caregivers of people living with terminal cancer: Prevalence and predictors. *Palliat Support Care*, 2018;17(3): 286–293. doi: 10.1017/S1478951518000044.
7. Costa-Requena G, Cristófol R, Cañete J. Caregivers' morbidity in palliative care unit: Predicting by gender, age, burden and self-esteem. *Support Care Cancer*, 2012;20(7): 1465–1470. doi: 10.1007/s00520-011-1233-6.
8. Williams A-L, McCorkle R. Cancer family caregivers during the palliative, hospice, and bereavement phases: A review of the descriptive psychosocial literature. *Palliat Support Care*, 2011;9(3): 315–325. doi: 10.1017/S1478951511000265.
9. Ullrich A, Ascherfeld L, Marx G, Bokemeyer C, Bergelt C, Oechsle K. Quality of life, psychological burden, needs, and satisfaction during specialized inpatient palliative care in family caregivers of advanced cancer patients. *BMC Palliat Care*, 2017;16(1): 31. doi: 10.1186/s12904-017-0206-z.
10. Saunders CM. *The Management of terminal malignant disease*. Edward Arnold: London, UK; 1984.
11. Cassel EJ. The Nature of suffering and the goals of medicine. *N Engl J Med*, 1982;306(11): 639–645.
12. Weisman AD, Worden JW. The existential plight in cancer: Significance of the first 100 days. *Int J Psychiatry Med*, 1976;7(1): 1–15. doi: 10.2190/uq2g-ugv1-3ppc-6387.
13. Grech A, Marks A. Existential suffering part 1: Definition and diagnosis #319. *J Palliat Med*, 2017;20(1): 93–94. doi: 10.1089/jpm.2016.0422.
14. Vehling S, Kissane DW. Existential distress in cancer: Alleviating suffering from fundamental loss and change. *Psychooncology*, 2018;27(11): 2525–2530. doi: 10.1002/pon.4872.
15. Breitbart W. Spirituality and meaning in supportive care: spirituality- and meaning-centered group psychotherapy interventions in advanced cancer. *Support Care Cancer*, 2002;10(4): 272–280. doi: 10.1007/s005200100289.
16. LeMay K, Wilson KG. Treatment of existential distress in life threatening illness: A review of manualized interventions. *Clin Psychol Rev*, 2008;28(3): 472–493. doi: 10.1016/j.cpr.2007.07.013.

17. Henoch I, Danielson E. Existential concerns among patients with cancer and interventions to meet them: An integrative literature review. *Psychooncology*, 2009;18(3): 225–236. doi: 10.1002/pon.1424.
18. Best M, Aldridge L, Butow P, Olver I, Webster F. Conceptual analysis of suffering in cancer: A systematic review. *Psychooncology*, 2015;24(9): 977–986. doi: 10.1002/pon.3795.
19. Boston PH, Bruce A, Schreiber R. Existential suffering in the palliative care setting: An integrated literature review. *J Pain Symptom Manage*, 2011;41(3): 604–618. doi: 10.1016/j.jpainsymman.2010.05.010.
20. Cherny NI, Coyle N, Foley KM. Suffering in the advanced cancer patient: A definition and taxonomy. *J Palliat Care*, 1994;10: 57–70.
21. Kissane DW. The relief of existential suffering. *Arch Intern Med*, 2012;172(19): 1501–1505. doi: 10.1001/archinternmed.2012.3633.
22. Lo C, Panday T, Zeppieri J, Rydall AC, Murphy-Kane P, Zimmermann C *et al*. Preliminary psychometrics of the Existential Distress Scale in patients with advanced cancer. *Eur J Cancer Care*, 2016;26(6). doi: 10.1111/ecc.12597.
23. Kissane DW, Clarke DM, Street AF. Demoralization syndrome -A relevant psychiatric diagnosis for palliative care. *J Palliat Care*, 2001;17(1): 12–21.
24. Krause S, Rydall AC, Hales S, Rodin G, Lo C. Initial validation of the Death and Dying Distress Scale for the assessment of death anxiety in patients with advanced cancer. *J Pain Symptom Manage*, 2015;49(1): 126–134. doi: 10.1016/j.jpainsymman.2014.04.012.
25. Lo C, Hales S, Zimmermann C, Gagliese L, Rydall AC, Rodin G. Measuring death-related anxiety in advanced cancer: Preliminary psychometrics of the Death and Dying Distress Scale. *J Pediatr Hematol Oncol*, 2011;33 Suppl 2: S140-5. doi: 10.1097/MPH.0b013e318230e1fd.
26. Chochinov HM, Hack T, Hassard T, Kristjanson LJ, McClement S, Harlos M. Dignity in the terminally ill: A cross-sectional, cohort study. *The Lancet*, 2002;360(9350): 2026–2030. doi: 10.1016/S0140-6736(02)12022-8.
27. Robinson S, Kissane DW, Brooker J, Burney S. A systematic review of the demoralization syndrome in individuals with progressive disease and cancer: A decade of research. *J Pain Symptom Manage*, 2015;49(3): 595–610. doi: 10.1016/j.jpainsymman.2014.07.008.
28. Tecuta L, Tomba E, Grandi S, Fava GA. Demoralization: A systematic review on its clinical characterization. *Psychol Med*, 2015;45(4): 673–691. doi: 10.1017/S0033291714001597.
29. Vehling S, Malfitano C, Shnall J, Watt S, Panday T, Chiu A *et al*. A concept map of death-related anxieties in patients with advanced cancer. *BMJ Support Palliat Care*, 2017;7(4): 427–434. doi: 10.1136/bmjspcare-2016-001287.
30. Chochinov HM, Kristjanson LJ, Hack TF, Hassard T, McClement S, Harlos M. Burden to others and the terminally ill. *J Pain Symptom Manage*, 2007;34(5): 463–471. doi: 10.1016/j.jpainsymman.2006.12.012.
31. Vehling S, Mehnert A. Symptom burden, loss of dignity, and demoralization in patients with cancer: A mediation model. *Psychooncology*, 2014;23(3): 283–290. doi: 10.1002/pon.3417.
32. Wentlandt K, Burman D, Swami N, Hales S, Rydall AC, Rodin G *et al*. Preparation for the end of life in patients with advanced cancer and association with communication with professional caregivers. *Psychooncology*, 2012;21(8): 868–876. doi: 10.1002/pon.1995.
33. Morita T, Kawa M, Honke Y, Kohara H, Maeyama E, Kizawa Y *et al*. Existential concerns of terminally ill cancer patients receiving specialized palliative care in Japan. *Support Care Cancer*, 2004;12(2): 137–140. doi: 10.1007/s00520-003-0561-6.

- 1
  - 2
  - 3
  - 4
  - 5
  - 6
  - 7
  - 8
  - 9
  - 10
  - 11
  - 12
  - 13
  - 14
  - 15
  - 16
  - 17
  - 18
  - 19
  - 20
  - 21
  - 22
  - 23
  - 24
  - 25
  - 26
  - 27
  - 28
  - 29
  - 30
  - 31
  - 32
  - 33
  - 34
  - 35
  - 36
  - 37
  - 38
  - 39
  - 40
  - 41
  - 42
  - 43
  - 44
  - 45
  - 46
  - 47
  - 48
  - 49
  - 50
  - 51
  - 52
  - 53
  - 54
  - 55
  - 56
  - 57
  - 58
  - 59
  - 60
34. Applebaum AJ, Farran CJ, Marziliano AM, Pasternak AR, Breitbart W. Preliminary study of themes of meaning and psychosocial service use among informal cancer caregivers. *Palliat Support Care*, 2014;12(2): 139–148. doi: 10.1017/S1478951513000084.
35. Stenberg U, Ruland CM, Miaskowski C. Review of the literature on the effects of caring for a patient with cancer. *Psychooncology*, 2010;19(10): 1013–1025. doi: 10.1002/pon.1670.
36. Eifert EK, Adams R, Dudley W, Perko M. Family caregiver identity: A literature review. *Am J Health Educ*, 2015;46(6): 357–367. doi: 10.1080/19325037.2015.1099482.
37. Oechsle K. Current advances in palliative & hospice care: problems and needs of relatives and family caregivers during palliative and hospice care - An overview of current literature. *Med Sci (Basel)*, 2019;7(3). doi: 10.3390/medsci7030043.
38. Reblin M, Small B, Jim H, Weimer J, Sherwood P. Mediating burden and stress over time: Caregivers of patients with primary brain tumor. *Psychooncology*, 2018;27(2): 607–612. doi: 10.1002/pon.4527.
39. Nielsen MK, Neergaard MA, Jensen AB, Vedsted P, Bro F, Guldin M-B. Preloss grief in family caregivers during end-of-life cancer care: A nationwide population-based cohort study. *Psychooncology*, 2017;26(12): 2048–2056. doi: 10.1002/pon.4416.
40. Applebaum AJ, Kryza-Lacombe M, Buthorn J, DeRosa A, Corner G, Diamond EL. Existential distress among caregivers of patients with brain tumors: A review of the literature. *Neurooncol Pract*, 2016;3(4): 232–244. doi: 10.1093/nop/npv060.
41. Badr H, Smith CB, Goldstein NE, Gomez JE, Redd WH. Dyadic psychosocial intervention for advanced lung cancer patients and their family caregivers: Results of a randomized pilot trial. *Cancer*, 2015;121(1): 150–158. doi: 10.1002/cncr.29009.
42. Badr H, Taylor CLC. Social constraints and spousal communication in lung cancer. *Psychooncology*, 2006;15(8): 673–683. doi: 10.1002/pon.996.
43. Manne S, Badr H. Intimacy and relationship processes in couples' psychosocial adaptation to cancer. *Cancer*, 2008;112(11 Suppl): 2541–2555. doi: 10.1002/cncr.23450.
44. Chiu Y-W, Huang C-T, Yin S-M, Huang Y-C, Chien C-H, Chuang H-Y. Determinants of complicated grief in caregivers who cared for terminal cancer patients. *Support Care Cancer*, 2010;18(10): 1321–1327. doi: 10.1007/s00520-009-0756-6.
45. Lobb EA, Kristjanson LJ, Aoun SM, Monterosso L, Halkett GKB, Davies A. Predictors of complicated grief: A systematic review of empirical studies. *Death Stud*, 2010;34(8): 673–698. doi: 10.1080/07481187.2010.496686.
46. Mystakidou K, Tsilika E, Parpa E, Galanos A, Vlahos L. Caregivers of advanced cancer patients: Feelings of hopelessness and depression. *Cancer Nurs*, 2007;30(5): 412–418.
47. Philipp R, Mehnert A, Müller V, Reck M, Vehling S. Perceived relatedness, death acceptance, and demoralization in patients with cancer. *Support Care Cancer*, 2019. doi: 10.1007/s00520-019-05088-2.
48. Fang C-K, Chang M-C, Chen P-J, Lin C-C, Chen G-S, Lin J *et al*. A correlational study of suicidal ideation with psychological distress, depression, and demoralization in patients with cancer. *Support Care Cancer*, 2014;22(12): 3165–3174. doi: 10.1007/s00520-014-2290-4.
49. Robinson S, Kissane DW, Brooker J, Hempton C, Burney S. The relationship between poor quality of life and desire to hasten death: A multiple mediation model examining the contributions of depression, demoralization, loss of control, and low self-worth. *J Pain Symptom Manage*, 2017;53(2): 243–249. doi: 10.1016/j.jpainsymman.2016.08.013.

- 1  
2  
3  
4  
5  
6  
7  
8  
9  
10  
11  
12  
13  
14  
15  
16  
17  
18  
19  
20  
21  
22  
23  
24  
25  
26  
27  
28  
29  
30  
31  
32  
33  
34  
35  
36  
37  
38  
39  
40  
41  
42  
43  
44  
45  
46  
47  
48  
49  
50  
51  
52  
53  
54  
55  
56  
57  
58  
59  
60
50. Vehling S, Kissane DW, Lo C, Glaesmer H, Hartung TJ, Rodin G *et al*. The association of demoralization with mental disorders and suicidal ideation in patients with cancer. *Cancer*, 2017;123(17): 3394–3401. doi: 10.1002/cncr.30749.
  51. Li M, Watt S, Escaf M, Gardam M, Heesters A, O’Leary G *et al*. Medical assistance in dying - Implementing a hospital-based program in Canada. *N Engl J Med*, 2017;376(21): 2082–2088.
  52. Lichtenthal WG, Nilsson M, Zhang B, Trice ED, Kissane DW, Breitbart W *et al*. Do rates of mental disorders and existential distress among advanced stage cancer patients increase as death approaches? *Psychooncology*, 2009;18(1): 50–61. doi: 10.1002/pon.1371.
  53. Dasch B, Kalies H, Feddersen B, Ruderer C, Hiddemann W, Bausewein C. Care of cancer patients at the end of life in a German university hospital: A retrospective observational study from 2014. *PLoS ONE*, 2017;12(4): e0175124. doi: 10.1371/journal.pone.0175124.
  54. Radbruch L, Andersohn F, Walker J. *Palliative care: Oversupply curative – undersupply palliative? Analysis of selected treatments at the end of life*. Available from: [https://www.bertelsmann-stiftung.de/fileadmin/files/BSt/Publikationen/GrauePublikationen/Studie\\_VV\\_FCG\\_Ueber-Unterversorgung-palliativ.pdf](https://www.bertelsmann-stiftung.de/fileadmin/files/BSt/Publikationen/GrauePublikationen/Studie_VV_FCG_Ueber-Unterversorgung-palliativ.pdf).
  55. Steinhäuser KE, Fitchett G, Handzo GF, Johnson KS, Koenig HG, Pargament KI *et al*. State of the science of spirituality and palliative care research Part I: Definitions, measurement, and outcomes. *J Pain Symptom Manage*, 2017;54(3): 428–440. doi: 10.1016/j.jpainsymman.2017.07.028.
  56. Phelps, Andrea C., Maciejewski PK, Nilsson M, Balboni TA, Wright AA *et al*. Religious coping and use of intensive life-prolonging care near death in patients with advanced cancer. *JAMA*, 2009;301(11).
  57. Applebaum AJ, Stein EM, Lord-Bessen J, Pessin H, Rosenfeld B, Breitbart W. Optimism, social support, and mental health outcomes in patients with advanced cancer. *Psychooncology*, 2014;23(3): 299–306. doi: 10.1002/pon.3418.
  58. Greer JA, Jacobs JM, El-Jawahri A, Nipp RD, Emily R. Gallagher, Pirl WF *et al*. Role of patient coping strategies in understanding the effects of early palliative care on quality of life and mood. *J Clin Oncol*, 2018;36(1): 53–60.
  59. Frankl VE. *Doctor and the soul: From Psychotherapy to Logotherapy*. Random House: New York, NY; 2010.
  60. Roepke AM, Jayawickreme E, Riffle OM. Meaning and health: A systematic review. *Appl Res Qual Life*, 2014;9(4): 1055–1079. doi: 10.1007/s11482-013-9288-9.
  61. Jim HS, Andersen BL. Meaning in life mediates the relationship between social and physical functioning and distress in cancer survivors. *Br J Health Psychol*, 2007;12(Pt 3): 363–381. doi: 10.1348/135910706X128278.
  62. Breitbart W, Rosenfeld B, Pessin H, Applebaum A, Kulikowski J, Lichtenthal WG. Meaning-centered group psychotherapy: an effective intervention for improving psychological well-being in patients with advanced cancer. *J Clin Oncol*, 2015;33(7): 749–754. doi: 10.1200/JCO.2014.57.2198.
  63. Guerrero-Torrelles M, Monforte-Royo C, Tomás-Sábado J, Marimon F, Porta-Sales J, Balaguer A. Meaning in life as a mediator between physical impairment and the wish to hasten death in patients with advanced cancer. *J Pain Symptom Manage*, 2017;54(6): 826–834. doi: 10.1016/j.jpainsymman.2017.04.018.
  64. Bates AT. Addressing existential suffering. *BC Med J*, 2016;58(5): 268–273.

- 1  
2  
3 65. Boston PH, Mount BM. The caregiver's perspective on existential and spiritual distress in  
4 palliative care. *J Pain Symptom Manage*, 2006;32(1): 13–26. doi:  
5 10.1016/j.jpainsymman.2006.01.009.  
6
- 7 66. Robinson S, Kissane DW, Brooker J, Hempton C, Michael N, Fischer J *et al*. Refinement and  
8 revalidation of the demoralization scale: The DS-II-external validity. *Cancer*, 2016;122(14):  
9 2260–2267. doi: 10.1002/cncr.30012.  
10
- 11 67. Robinson S, Kissane DW, Brooker J, Michael N, Fischer J, Franco M *et al*. Refinement and  
12 revalidation of the demoralization scale: The DS-II-internal validity. *Cancer*, 2016;122(14): 2251–  
13 2259. doi: 10.1002/cncr.30015.  
14
- 15 68. Kissane DW, Wein S, Love A, Lee XQ, Kee PL, Clarke DM. The Demoralization Scale: A report of  
16 its development and preliminary validation. *J Palliat Care*, 2004;20(4): 269–276.  
17
- 18 69. Mehnert A, Vehling S, Höcker A, Lehmann C, Koch U. Demoralization and depression in patients  
19 with advanced cancer: Validation of the German version of the demoralization scale. *J Pain*  
20 *Symptom Manage*, 2011;42(5): 768–776. doi: 10.1016/j.jpainsymman.2011.02.013.  
21
- 22 70. Engelmann D, Scheffold K, Friedrich M, Hartung TJ, Schulz-Kindermann F, Lordick F *et al*. Death-  
23 related anxiety in patients with advanced cancer: Validation of the German Version of the Death  
24 and Dying Distress Scale. *J Pain Symptom Manage*, 2016;52(4): 582–587. doi:  
25 10.1016/j.jpainsymman.2016.07.002.  
26
- 27 71. Blatt SJ, D'Afflitti JP, Quinlan DM. Experiences of depression in normal young adults. *J Abnorm*  
28 *Psychol*, 1976;85(4): 383–389.  
29
- 30 72. Blatt SJ, Zohar AH, Quinlan DM, Zuroff DC, Mongrain M. Subscales within the dependency factor  
31 of the Depressive Experiences Questionnaire. *J Pers Assess*, 1995;64(2): 319–339. doi:  
32 10.1207/s15327752jpa6402\_11.  
33
- 34 73. Blatt SJ, Quinlan DM, Chevron ES, McDonald C, Zuroff DC. Dependency and self-criticism:  
35 Psychological dimensions of depression. *J Consult Clin Psychol*, 1982;50(1): 113–124.  
36
- 37 74. Beutel ME, Wiltink J, Hafner C, Reiner I, Bleichner F, Blatt SJ. Abhängigkeit und Selbstkritik als  
38 psychologische Dimensionen der Depression - Validierung der deutschsprachigen Version des  
39 Depressive Experience Questionnaire (DEQ). *Z Klin Psychol Psychiatr Psychother*, 2004;52(4):  
40 291–387.  
41
- 42 75. Krieger T, Zimmermann J, Beutel ME, Wiltink J, Schauenburg H, Holtforth MG. Ein Vergleich  
43 verschiedener Kurzversionen des Depressive Experiences Questionnaire (DEQ) zur Erhebung von  
44 Selbstkritik und Abhängigkeit. *Diagnostica*, 2014;60(3): 126–139. doi: 10.1026/0012-  
45 1924/a000105.  
46
- 47 76. Vehling S, Gerstorf D, Schulz-Kindermann F, Oechsle K, Philipp R, Scheffold K *et al*. The daily  
48 dynamics of loss orientation and life engagement in advanced cancer: A pilot study to  
49 characterise patterns of adaptation at the end of life. *Eur J Cancer Care*, 2018;27(4): e12842.  
50 doi: 10.1111/ecc.12842.  
51
- 52 77. Wilson KG, Scott JF, Graham ID, Kozak JF, Chater S, Viola *et al*. Attitudes of terminally ill patients  
53 toward euthanasia and physician-assisted suicide. *Arch Intern Med*, 2000;160(16): 2454–2460.  
54
- 55 78. Chochinov HM, Hassard T, McClement S, Hack T, Kristjanson LJ, Harlos M *et al*. The Patient  
56 Dignity Inventory: A novel way of measuring dignity-related distress in palliative care. *J Pain*  
57 *Symptom Manage*, 2008;36(6): 559–571. doi: 10.1016/j.jpainsymman.2007.12.018.  
58
- 59 79. Sautier LP, Vehling S, Mehnert A. Assessment of patients' dignity in cancer care: Preliminary  
60 psychometrics of the German version of the Patient Dignity Inventory (PDI-G). *J Pain Symptom*  
*Manage*, 2014;47(1): 181–188. doi: 10.1016/j.jpainsymman.2013.02.023.

- 1  
2  
3 80. Marwit SJ, Meuser TM. Development of a short form inventory to assess grief in caregivers of  
4 dementia patients. *Death Stud*, 2005;29(3): 191–205. doi: 10.1080/07481180590916335.  
5  
6 81. Losada A, Márquez-González M, Peñacoba C, Romero-Moreno R. Development and validation of  
7 the Caregiver Guilt Questionnaire. *Int Psychogeriatr*, 2010;22(4): 650–660. doi:  
8 10.1017/S1041610210000074.  
9  
10 82. Earle CC, Park ER, Lai B, Weeks JC, Ayanian JZ, Block S. Identifying potential indicators of the  
11 quality of end-of-life cancer care from administrative data. *J Clin Oncol*, 2003;21(6): 1133–1138.  
12 doi: 10.1200/JCO.2003.03.059.  
13  
14 83. First MB, Williams JBW, Karg RS, Spitzer RL. *Structured Clinical Interview for DSM-5 Disorders:*  
15 *Clinician Version (SCID-5-CV)*. American Psychiatric Association: Arlington, VA; 2016.  
16  
17 84. American Psychiatric Association. *Diagnostic and statistical manual of mental disorders*, 5th ed.  
18 American Psychiatric Association: Arlington, VA; 2013.  
19  
20 85. Beesdo-Baum K, Zaudig M, Wittchen H-U. *Strukturiertes Klinisches Interview für DSM-5®-*  
21 *Störungen – Klinische Version*, 1st ed. Hogrefe: Göttingen; 2019.  
22  
23 86. Perkonigg A, Lorenz L, Maercker A. Prevalence and correlates of ICD-11 adjustment disorder:  
24 Findings from the Zurich Adjustment Disorder Study. *Int J Clin Health Psychol*, 2018;18(3): 209–  
25 217. doi: 10.1016/j.ijchp.2018.05.001.  
26  
27 87. World Health Organization. *International classification of diseases for mortality and morbidity*  
28 *statistics* [Cited 2020 May 27]. Available from: <https://icd.who.int/browse11/l-m/en>.  
29  
30 88. Kolva E, Rosenfeld B, Liu Y, Pessin H, Breitbart W. Using item response theory (IRT) to reduce  
31 patient burden when assessing desire for hastened death. *Psychol Assess*, 2017;29(3): 349–353.  
32  
33 89. Rosenfeld B, Breitbart W, Galietta M, Kaim M, Funesti-Esch J, Pessin H *et al*. The Schedule of  
34 Attitudes toward Hastened Death: Measuring desire for death in terminally ill cancer patients.  
35 *Cancer*, 2000;88(12): 2868–2875.  
36  
37 90. Galushko M, Strupp J, Walisko-Waniek J, Hahn M, Löffert S, Ernstmann N *et al*. Validation of the  
38 German version of the Schedule of Attitudes Toward Hastened Death (SAHD-D) with patients in  
39 palliative care. *Palliat Support Care*, 2015;13(3): 713–723. doi: 10.1017/S1478951514000492.  
40  
41 91. Beck AT, Steer RA. *Beck Scale for Suicide Ideation (BSS)*. Pearson: Bloomington; 1993.  
42  
43 92. Kliem S, Brähler E. *Beck-Suizidgedanken-Skala (BSS)*, 1st ed. Pearson Assessment: Frankfurt am  
44 Main; 2015.  
45  
46 93. Prigerson HG, Maciejewski PK, Reynolds III CF, Bierhals AJ, Newsom JT, Fasiczka A *et al*.  
47 Inventory of Complicated Grief: A scale to measure maladaptive symptoms of loss. *Psychiatry*  
48 *Res*, 1995;59: 65–79.  
49  
50 94. Lumbeck G, Brandstätter M, Geissner E. Erstvalidierung der deutschen Version des „Inventory of  
51 Complicated Grief“ (ICG-D). *Z Klin Psychol Psychother*, 2012;41(4): 243–248. doi: 10.1026/1616-  
52 3443/a000172.  
53  
54 95. Curtis JR, Patrick DL, Engelberg RA, Norris K, Asp C, Byock I. A measure of the quality of dying  
55 and death: Initial validation using after-death interviews with family members. *J Pain Symptom*  
56 *Manage*, 2002;24(1): 17–31.  
57  
58 96. Mah K, Hales S, Weerakkody I, Liu L, Fernandes S, Rydall AC *et al*. Measuring the quality of dying  
59 and death in advanced cancer: Item characteristics and factor structure of the Quality of Dying  
60 and Death Questionnaire. *Palliat Med*, 2020;33(3): 369–380.  
97. Heckel M, Bussmann S, Stiel S, Weber M, Ostgathe C. Validation of the German Version of the  
Quality of Dying and Death Questionnaire for Informal Caregivers (QODD-D-Ang). *J Pain  
Symptom Manage*, 2015;50(3): 402–413. doi: 10.1016/j.jpainsymman.2015.03.020.



- 1  
2  
3 98. Chang VT, Hwang SS, Feuerman M, Kasimis BS, Thaler HT. The Memorial Symptom Assessment  
4 Scale Short Form (MSAS-SF). *Cancer*, 2000;89(5): 1162–1171.  
5  
6 99. Kroenke K, Spitzer RL, Williams JBW. The PHQ-9. *J Gen Intern Med*, 2001;16(9): 606–613. doi:  
7 10.1046/j.1525-1497.2001.016009606.x.  
8  
9 100. Spitzer RL, Kroenke K, Williams JBW, Löwe B. A brief measure for assessing generalized anxiety  
10 disorder. *Arch Intern Med*, 2006;166: 1092–1097.  
11  
12 101. Löwe B, Decker O, Müller S, Brähler E, Schellberg D, Herzog W *et al*. Validation and  
13 standardization of the Generalized Anxiety Disorder Screener (GAD-7) in the general population.  
14 *Med Care*, 2008;46(3): 266–274. doi: 10.1097/MLR.0b013e318160d093.  
15  
16 102. Rief W, Nanke A, Klaiberg A, Brähler E. Base rates for panic and depression according to the  
17 Brief Patient Health Questionnaire: A population-based study. *J Affect Disord*, 2004;82(2): 271–  
18 276. doi: 10.1016/j.jad.2003.11.006.  
19  
20 103. Schnell T, Becker P. *Der Fragebogen zu Lebensbedeutungen und Lebenssinn (LeBe)*. Hogrefe:  
21 Göttingen; 2007.  
22  
23 104. Spangenberg L, Zenger M, Garcia-Torres F, Mueller V, Reck M, Mehnert A *et al*. Dimensionality,  
24 stability, and validity of the Beck Hopelessness Scale in cancer patients receiving curative and  
25 palliative treatment. *J Pain Symptom Manage*, 2016;51(3): 615–622. doi:  
26 10.1016/j.jpainsymman.2015.11.008.  
27  
28 105. IBM Corp. *IBM SPSS Statistics for Windows, Version 25.0*. IBM Corp.: Armonk, NY; 2017.  
29  
30 106. RStudio Team. *RStudio: Integrated development for R*. RStudio, Inc.: Boston, MA; 2016.  
31  
32 107. R Core Team. *R: A language and environment for statistical computing*. R Foundation for  
33 Statistical Computing: Vienna, Austria; 2019.  
34  
35 108. Hoerger M, Cullen BD. Early integrated palliative care and reduced emotional distress in cancer  
36 caregivers: Reaching the "hidden patients". *Oncologist*, 2017;22(12): 1419–1420. doi:  
37 10.1634/theoncologist.2017-0432.  
38  
39 109. Kristjanson, Linda J., Aoun SM. Palliative care for families: Remembering the hidden patients.  
40 *Can J Psychiatry*, 2004;49(6): 359-365.  
41  
42 110. Kissane DW, Bobevski I, Gaitanis P, Brooker J, Michael N, Lethborg C *et al*. Exploratory  
43 examination of the utility of demoralization as a diagnostic specifier for adjustment disorder  
44 and major depression. *Gen Hosp Psychiatry*, 2017;46: 20–24. doi:  
45 10.1016/j.genhosppsy.2017.01.007.  
46  
47  
48  
49  
50  
51  
52  
53  
54  
55  
56  
57  
58  
59  
60

1  
2  
3 **Declarations**  
4

5 **Acknowledgements**  
6

7 We would like to thank David Kissane and Irene Bobevski for their valuable support regarding the  
8 assessment protocol.  
9

10  
11 **Author contributions**  
12

13 SV, MH, CB, and KO designed the study and coordinate the research project. RP, AK and SV wrote the  
14 first draft of the manuscript. MH, CB, KO, and UK revised it critically for important intellectual content.  
15 All authors approved the final version of the manuscript and agree to be accountable for all aspects of  
16 the study.  
17  
18  
19

20  
21 **Funding**  
22

23 This work is supported by the Max-Eder junior research group program of the German Cancer Aid  
24 (grant number 70113404).  
25

26  
27 **Competing interests**  
28

29 All authors declare no conflict of interest.  
30

31 **Word count:** 4,372  
32  
33  
34  
35  
36  
37  
38  
39  
40  
41  
42  
43  
44  
45  
46  
47  
48  
49  
50  
51  
52  
53  
54  
55  
56  
57  
58  
59  
60

1  
2  
3  
4  
5  
6  
7  
8  
9  
10  
11  
12  
13  
14  
15  
16  
17  
18  
19  
20  
21  
22  
23  
24  
25  
26  
27  
28  
29  
30  
31  
32  
33  
34  
35  
36  
37  
38  
39  
40  
41  
42  
43  
44  
45  
46  
47  
48  
49  
50  
51  
52  
53  
54  
55  
56  
57  
58  
59  
60

**Figure 1.** Taxonomy of existential concerns among patients and caregivers.

For peer review only

**Table 1.** Self-report questionnaires and observer-rated instruments

|                                                                                      | Construct measured                                    | Patients | Caregivers |
|--------------------------------------------------------------------------------------|-------------------------------------------------------|----------|------------|
| <b>Existential distress</b>                                                          |                                                       |          |            |
| Demoralization Scale-II (DS-II)                                                      | Demoralization                                        | •        | •          |
| Death Anxiety and Distress Scale (DADDS)                                             | Death anxiety                                         | •        | •          |
| Depressive Experiences Questionnaire (DEQ)<br>Subscales: Dependence, Relatedness     | Perceived relatedness                                 | •        | •          |
| Revised Loss Orientation and Life Engagement in<br>Advanced Cancer Scale (LOLES)     | Loss orientation and life<br>engagement               | •        | •          |
| Dignity-Item (SDI)                                                                   | Dignity-related concerns                              | •        |            |
| Patient Dignity Inventory (PDI)                                                      | Dignity-related concerns<br>Identity-related concerns | •        |            |
| Marwit-Meuser Caregiver Grief Inventory<br>(MM-CGI-SF) <sup>a</sup>                  | Anticipatory grief                                    |          | •          |
| Caregiver Guilt Questionnaire (CGQ) <sup>a</sup>                                     | Guilt                                                 |          | •          |
| <b>End-of-Life outcomes and prevalence of mental disorders</b>                       |                                                       |          |            |
| Disease- and medical care-related characteristics <sup>b</sup>                       | Aggressiveness of care                                | •        |            |
| Structured Clinical Interview for DSM-5 (SCID-5) <sup>c</sup>                        | Affective disorders<br>Anxiety disorders              | •        | •          |
| Adjustment Disorder-CIDI – New Module<br>(AjD-CIDI) <sup>c</sup>                     | Adjustment disorder                                   | •        | •          |
| Schedule of Attitudes Toward Hastened Death –<br>Short Form (SAHD-A)                 | Desire for hastened death                             | •        |            |
| Beck Scale for Suicide Ideation (BSS)                                                | Suicidal ideation                                     | •        | •          |
| Structured Interview for Psychological Adjustment<br>and Demoralisation <sup>c</sup> | Coping<br>Demoralization                              | •        | •          |
| Inventory of Complicated Grief (ICG) <sup>d</sup>                                    | Complicated grief                                     |          | •          |
| Quality of Dying and Death Questionnaire (QODD) <sup>d</sup>                         | Quality of dying and<br>death                         |          | •          |
| <b>Control variables, resources, and support needs</b>                               |                                                       |          |            |
| Memorial Symptom Assessment Scale – Short<br>Form (MSAS-SF)                          | Symptom burden                                        | •        |            |
| Patient Health Questionnaire-9 (PHQ-9)                                               | Symptoms of depression                                | •        | •          |
| Generalized Anxiety Disorder Questionnaire-7<br>(GAD-7)                              | Symptoms of anxiety                                   | •        | •          |
| Sources of Meaning and Meaning in Life<br>Questionnaire (LeBe)                       | Meaningfulness in life<br>Crisis of meaning           | •        | •          |
| Need for and utilization of psychosocial support                                     |                                                       | •        | •          |

<sup>a</sup>Not assessed after the patient's death<sup>b</sup>Assessed via medical chart review<sup>c</sup>Observer-rated interview<sup>d</sup>Assessed only after the patients' death

1  
2  
3  
4  
5  
6  
7  
8  
9  
10  
11  
12  
13  
14  
15  
16  
17  
18  
19  
20  
21  
22  
23  
24  
25  
26  
27  
28  
29  
30  
31  
32  
33  
34  
35  
36  
37  
38  
39  
40  
41  
42  
43  
44  
45  
46  
47  
48  
49  
50  
51  
52  
53  
54  
55  
56  
57  
58  
59  
60

**Existential distress of patients and caregivers in life-threatening illness**

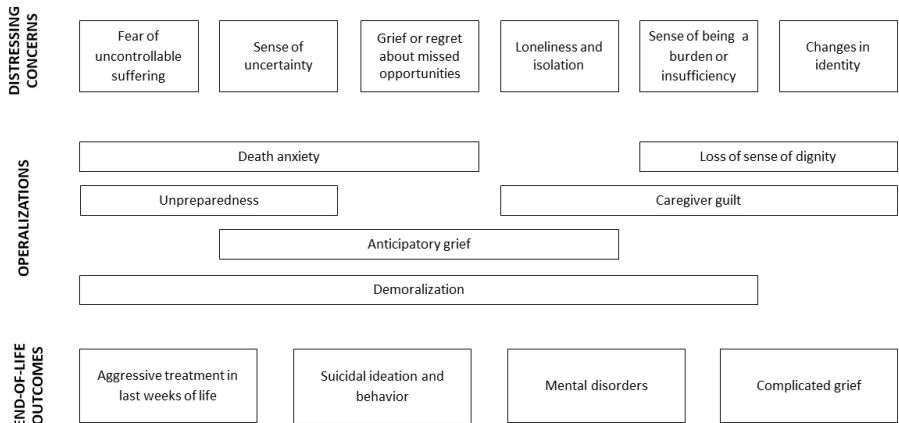

Figure 1. Taxonomy of existential concerns among patients and caregivers.

338x190mm (96 x 96 DPI)

# BMJ Open

## Existential distress in patients with advanced cancer and their caregivers: study protocol of a longitudinal cohort study

|                                 |                                                                                                                                                                                                                                                                                                                                                                                                                                                                                                 |
|---------------------------------|-------------------------------------------------------------------------------------------------------------------------------------------------------------------------------------------------------------------------------------------------------------------------------------------------------------------------------------------------------------------------------------------------------------------------------------------------------------------------------------------------|
| Journal:                        | <i>BMJ Open</i>                                                                                                                                                                                                                                                                                                                                                                                                                                                                                 |
| Manuscript ID                   | bmjopen-2020-046351.R1                                                                                                                                                                                                                                                                                                                                                                                                                                                                          |
| Article Type:                   | Protocol                                                                                                                                                                                                                                                                                                                                                                                                                                                                                        |
| Date Submitted by the Author:   | 18-Feb-2021                                                                                                                                                                                                                                                                                                                                                                                                                                                                                     |
| Complete List of Authors:       | Philipp, Rebecca; University Medical Center Hamburg-Eppendorf, Kalender, Anna; University Medical Center Hamburg-Eppendorf Härter, Martin; Universitäts Klinikum Hamburg-Eppendorf, Bokemeyer, C; University Medical Center Hamburg-Eppendorf Oechsle, Karin; University Medical Center Hamburg-Eppendorf, Department of Oncology, Hematology and BMT, Palliative Care Unit Koch, Uwe; University Medical Center Hamburg-Eppendorf Vehling, Sigrun; University Medical Center Hamburg-Eppendorf |
| <b>Primary Subject Heading</b>: | Palliative care                                                                                                                                                                                                                                                                                                                                                                                                                                                                                 |
| Secondary Subject Heading:      | Mental health, Palliative care                                                                                                                                                                                                                                                                                                                                                                                                                                                                  |
| Keywords:                       | Adult palliative care < PALLIATIVE CARE, Suicide & self-harm < PSYCHIATRY, MENTAL HEALTH, ONCOLOGY                                                                                                                                                                                                                                                                                                                                                                                              |
|                                 |                                                                                                                                                                                                                                                                                                                                                                                                                                                                                                 |

SCHOLARONE™  
Manuscripts



I, the Submitting Author has the right to grant and does grant on behalf of all authors of the Work (as defined in the below author licence), an exclusive licence and/or a non-exclusive licence for contributions from authors who are: i) UK Crown employees; ii) where BMJ has agreed a CC-BY licence shall apply, and/or iii) in accordance with the terms applicable for US Federal Government officers or employees acting as part of their official duties; on a worldwide, perpetual, irrevocable, royalty-free basis to BMJ Publishing Group Ltd ("BMJ") its licensees and where the relevant Journal is co-owned by BMJ to the co-owners of the Journal, to publish the Work in this journal and any other BMJ products and to exploit all rights, as set out in our [licence](#).

The Submitting Author accepts and understands that any supply made under these terms is made by BMJ to the Submitting Author unless you are acting as an employee on behalf of your employer or a postgraduate student of an affiliated institution which is paying any applicable article publishing charge ("APC") for Open Access articles. Where the Submitting Author wishes to make the Work available on an Open Access basis (and intends to pay the relevant APC), the terms of reuse of such Open Access shall be governed by a Creative Commons licence – details of these licences and which [Creative Commons](#) licence will apply to this Work are set out in our licence referred to above.

Other than as permitted in any relevant BMJ Author's Self Archiving Policies, I confirm this Work has not been accepted for publication elsewhere, is not being considered for publication elsewhere and does not duplicate material already published. I confirm all authors consent to publication of this Work and authorise the granting of this licence.

**Authors** Rebecca Philipp, MSc,<sup>1</sup> Anna Kalender, MSc,<sup>1,2</sup> Martin Härter, MD, PhD<sup>1</sup>  
Carsten Bokemeyer, MD,<sup>2</sup> Karin Oechsle, MD,<sup>23</sup> Uwe Koch, MD, PhD<sup>1</sup>, Sigrun  
Vehling, PhD<sup>1,2</sup>

**Title** Existential distress in patients with advanced cancer and their caregivers:  
study protocol of a longitudinal cohort study

**Article type** Original article

### **Affiliations and addresses**

<sup>1</sup>University Medical Center Hamburg-Eppendorf, Department of Medical Psychology, Martinistr. 52 -  
W26, 20246 Hamburg, Germany

<sup>2</sup>Department of Oncology, Hematology, and Bone Marrow Transplantation with Section of  
Pneumology, University Medical Center Hamburg-Eppendorf, Hamburg, Germany

<sup>3</sup>Head of Palliative Care Unit, Department of Oncology, Hematology, and Bone Marrow  
Transplantation with Section of Pneumology, University Medical Center Hamburg-Eppendorf,  
Hamburg, Germany

### **Corresponding author**

Rebecca Philipp, Phone +49 40 7410 56203, Fax +49 40 7410 54940, e-Mail r.philipp@uke.de

### **ORCID**

Rebecca Philipp 0000-0002-1875-3823

Martin Härter 0000-0001-7443-9890

Carsten Bokemeyer 0000-0001-6071-7810

Karin Oechsle 0000-0002-5183-641X

Sigrun Vehling 0000-0001-9314-4326

**Word count (body text):** 4573

**Author contributions:** Conceptualization and design: RP, SV; Drafting and critical revision: All authors; Final approval of the version to be published: All authors; Accountable for all aspects of the work: All authors

**Funding:** This study is funded by the Max-Eder junior research group program of the German Cancer Aid [grant number 70113404].

**Conflict of interest:** The authors declare no conflict of interest.

**Number of figures:** 1, **Number of tables:** 3



## Abstract

### Introduction

At the end of life, patients with advanced cancer and their informal caregivers may confront multiple existential concerns. Despite the strong potential to alleviate existential distress through psychosocial interventions, existential distress and its impact on health care outcomes have not yet been studied systematically. We aim to investigate the frequency, longitudinal trajectory, and predictive impact of existential distress on end-of-life outcomes. We further aim to determine patients' and caregivers' specific need for and utilization of psychosocial support for existential distress.

### Methods

This longitudinal cohort study will consecutively recruit 500 patients with advanced cancer and 500 caregivers from oncological outpatient and inpatient clinics. Participants will complete self-report questionnaires (sociodemographic and disease-related characteristics, existential distress, end-of-life outcomes, resources, and support needs) at five points of assessment (at baseline and after 3, 6, 9, and 12 months). At baseline and 6-month follow-up, we will conduct structured diagnostic interviews to assess mental disorders. Statistical analyses will include descriptive statistics to determine the prevalence of existential distress, mental disorders and end-of-life outcomes; multiple linear and logistic regression analyses to calculate the predictive impact of existential distress on end-of-life outcomes; and growth mixture models to analyze longitudinal trajectories of existential distress.

### Discussion

This study will provide comprehensive knowledge about patients' and caregivers' existential concerns. The longitudinal empirical data will allow for conclusions concerning the frequency and course of existential distress throughout one year. This important extension of existing cross-sectional research will contribute to further develop targeted psychosocial interventions. Profiles of existential distress may be applied by clinicians from multiple professions and help to address existential concerns effectively.

### Strengths and limitations

- longitudinal empirical data will allow for conclusions concerning frequency and course of existential distress in patients and caregivers throughout one year
- recruitment strategy allows enrollment of a large, heterogeneous sample of patients with advanced cancer from a range of clinics and treatment facilities
- profiles of existential distress may be applied by clinicians from multiple professions and help to address existential concerns effectively
- extensive assessment of psychological distress in a potentially highly distressed and understudied sample
- potentially high dropout rates due to patients' physical decline or death within the study period

### Ethics and dissemination

The study was approved by the institutional research ethics committee (reference number LPEK-0177). Results will be presented at scientific conferences and published in peer-reviewed journals. Other forms of dissemination will include sharing results on the psychometric properties of the structured demoralization interview with international research groups and communication with health care professionals providing psychosocial treatment for patients and caregivers. Following scientific standards, our progress will be regularly updated on [clinicaltrials.gov](http://clinicaltrials.gov).

### Study registration

[clinicaltrials.gov](http://clinicaltrials.gov): NCT04600206

### Keywords

Advanced cancer, caregivers, death anxiety, demoralization, existential distress, longitudinal, mental disorders, palliative care, suicidal ideation and behavior, desire for hastened death

## Introduction

In Germany, more than 230,000 individuals die from cancer each year. Due to an aging population and improvement in life-prolonging anticancer treatments, the number of patients and caregivers who face the existential consequences of living with advanced incurable cancer will strongly increase over the next years.[1, 2] In about one third of cancer patients, multiple sources of distress are associated with increased levels of depression and anxiety.[3, 4] Informal caregivers are confronted with often conflicting demands of caring for a severely ill loved one and maintaining a focus on their own needs, resulting in high levels of psychological distress.[5–8] Although the existential domain of suffering has long been incorporated into a bio-psycho-social perspective in advanced cancer and palliative care,[9–11] existential distress has received little attention in systematic quantitative or prospective research in these populations.

Existential distress refers to a distinct domain of cancer-related distress. It may occur alongside other forms of distress, but can also arise independently, even when physical pain is treated, social support is available and no mental disorder is present.[12, 13] Due to the fundamental losses and changes advanced cancer can cause, emotional pain and despair may be experienced as "existential", similar to the distress described by existential philosophers, which arises from the finitude of life and the ramifications of existence.[14] Based on earlier reviews and conceptual literature,[15–20] we propose a taxonomy that integrates different existential concerns among patients and caregivers and links them to operationalizations of existential distress (Figure 1, first and middle part). According to this taxonomy, frequently described existential concerns including fear of what will happen at death, uncertainty, unpreparedness, a sense of being a burden to others, or a sense of profound loneliness, can be systematically measured by clearly defined concepts. Operationalizations of existential distress concepts in cancer patients include for example death anxiety,[21, 22] demoralization,[23] and dignity-related concerns[24, 25] (Figure 1, middle part). Figure 1 (middle and lower part) further illustrates the research model for association of these concepts with end-of-life outcomes.

Demoralization is defined by lowered morale and a perceived incapacity to cope that can become associated with a sense of helplessness and failure and a loss of self-worth, hope, and meaning in life.[26] Systematic reviews indicate that 20% of patients with advanced cancer experience demoralization.[27, 28] Death anxiety refers to distress due to a shortened life expectancy, fears about uncontrollable suffering, worry about the impact of one's death on others and regret about missed opportunities in life.[21, 22] A study in 382 outpatients with advanced cancer found significant death anxiety in 27% of the study participants.[29] Dignity-related concerns, such as perceived burdensomeness, were reported by up to 23% of the patients,[30, 31] while 8% experienced a significantly impaired sense of dignity.[25] Other related categories of existential

1  
2  
3 concerns include unpreparedness at the end of life (31%),[32] loss of control (16%), isolation (22%),  
4 uncompleted life tasks (7%) and loss of continuity (loss of role, loss of enjoyable activity and loss of  
5 being oneself) (10%).[33]

6  
7  
8 Especially spouses of cancer patients may experience identity-related existential concerns (20%).[34]  
9  
10 This may include role strain through the adoption of the caregiver-role and associated changes in the  
11 relationship.[35] Caregivers may experience a change in their identity as a result of the extensive  
12 impact of caregiving on everyday life and the exertion of other important roles.[35, 36] They may  
13 also suffer from the patient's perceived loss of identity.[37]

14  
15  
16  
17 However, to date there is only limited research about the occurrence of existential distress in  
18 caregivers. While both patients and caregivers may be affected by demoralization and death anxiety,  
19 caregivers also face unique existential concerns including guilt, anticipatory grief,[5, 38] or despair  
20 about how to go on after their partner's death.[39] They often feel incompetent and unprepared for  
21 the task of caring for a loved one, which may lead to feelings of insufficiency and guilt for not  
22 providing appropriate care.[40] At the same time, caregivers often experience the pressure of  
23 maintaining hope and a positive attitude, preventing them from discussing own concerns.[41] Given  
24 this double challenge, caregivers may feel isolated and lonely. Whereas some couples manage to  
25 renegotiate roles and find ways to communicate about these issues, patients also tend to feel  
26 alienated by their caregivers' denial and avoidance of conflict.[42] This lack of perceived relatedness  
27 in close relationships is a common source of existential distress for patients and caregivers.[43]  
28  
29 Moreover, difficulties in coping with existential concerns have been associated with complicated  
30 grief.[44, 45] Yet little is known on the extent to which caregivers are affected by their own  
31 existential fears and hopelessness.[46]

32  
33  
34  
35 Among patients with advanced cancer, cross-sectional studies do not only suggest a positive  
36 association between demoralization and an increased risk for adjustment, depressive and anxiety  
37 disorders, they also found positive associations between existential distress and suicidal ideation or  
38 the desire for hastened death.[47–49] In the context of legalizing physician-assisted suicide in  
39 Canada, Li et al.[50] observed existential distress to be an important motive for these requests. A  
40 rare longitudinal study found an increase of existential distress over time.[51] Moreover, existential  
41 issues may contribute to receiving aggressive treatments in the last weeks of life.[52, 53] Studies also  
42 indicate a positive association of religious coping with aggressive treatment at the end of life.[54, 55]  
43  
44 It is possible that existential distress is linked to a form of coping that interferes with prognostic  
45 awareness and timely end-of-life discussions. There is growing evidence that the ability to maintain a  
46 sense of meaning, acceptance and use of approach-oriented coping may contribute to better end-of-  
47 life outcomes.[56, 57] However, the role of death anxiety, lack of preparedness, a strong hope for  
48  
49  
50  
51  
52  
53  
54  
55  
56  
57  
58  
59  
60

1  
2  
3 cure, and incongruence of patient and caregiver acceptance for end-of-life care outcomes is currently  
4 unclear.[58] Although the impact of caregiver existential distress on patient end-of-life outcomes  
5 may be partially mediated by patient existential distress, a relevant impact may be expected.[7]  
6  
7  
8  
9

## 10 **Objectives**

11  
12  
13 Existential distress may have profound consequences for health care outcomes of patients and their  
14 caregivers at the end of life. Despite their strong potential for alleviation through psychosocial  
15 interventions, clinicians struggle to recognize and address existential concerns.[59, 60] In the shadow  
16 of prominent debates about autonomy at the end of life, research has fallen short of understanding  
17 the multifaceted factors that underlie existential distress. Due to the lack of systematic longitudinal  
18 studies, there is limited knowledge about the occurrence of existential distress, how it evolves over  
19 time, and its prospective impact on important end-of-life outcomes. Moreover, it is of substantial  
20 clinical relevance to assess caregivers' existential issues quantitatively, which have been  
21 predominantly studied qualitatively so far.  
22  
23  
24  
25  
26  
27

28 This study will systematically assess existential distress and investigate its impact on patient- and  
29 caregiver-relevant outcomes at the end of life. Therefore, we aim  
30  
31

- 32 1) to investigate the frequency and longitudinal trajectory of existential distress in patients with  
33 advanced cancer and their caregivers,  
34
- 35 2) to examine the predictive impact of existential distress on patient- and caregiver-relevant end-of-  
36 life outcomes,  
37
- 38 3) to determine patients' and caregivers' specific need for and utilization of psychosocial support  
39 with respect to existential concerns, and  
40
- 41 4) to explore typical profiles of existential distress in patients and caregivers.  
42  
43  
44  
45  
46

## 47 **Methods and analysis**

### 48 **Study design**

49  
50  
51 Starting October 2020, we will conduct a longitudinal cohort study over a period of 12 months. This  
52 study period includes five points of assessment at baseline (T1), 3 months (T2), 6 months (T3), 9  
53 months (T4) and 12 months (T5). The study was registered at clinicaltrials.gov: NCT04600206.  
54  
55  
56  
57  
58

### 59 **Participants and recruitment**

1  
2  
3 We will consecutively recruit 500 patients and 500 informal caregivers from outpatient and inpatient  
4 clinics including oncological and palliative care units at the University Cancer Center Hamburg (UCCH,  
5 University Medical Center Hamburg and affiliated hospitals located in the Hamburg metropolitan  
6 region). Eligible patients are at least 18 years old and diagnosed with advanced cancer as defined by  
7 Union for International Cancer Control (UICC) stage IV solid tumors. Eligible caregivers (spouse or  
8 partner, family member or close friend) are at least 18 years old. Assessment will include patients  
9 with advanced cancer and caregivers across all phases of advanced disease from diagnosis to  
10 terminal stages to reflect a cross-section of treatment settings, tumor entities, and time since  
11 diagnosis. Recruitment is not limited to patient-caregiver dyads; patients and caregivers can  
12 participate individually. Exclusion criteria for patients and caregivers are severe cognitive or physical  
13 impairment and insufficient ability to speak German to give informed consent and to complete the  
14 self-report questionnaires.

### 25 26 **Procedures**

27  
28 Patients and caregivers will be approached on occasion of treatment at the respective clinic by  
29 trained research assistants. We will obtain written informed consent from patients and caregivers  
30 prior to participation. Participants may withdraw informed consent at any time. Patients and  
31 caregivers will complete paper-pencil self-report questionnaires to measure existential distress and  
32 respective support needs at each point of assessment. At baseline (T1) and after 6 months (T3), we  
33 will conduct structured diagnostic interviews with patients and caregivers face-to-face or via  
34 telephone to assess mental disorders.

35  
36 We will assess sociodemographic characteristics of patients and caregivers (age, gender, education,  
37 and socioeconomic data) using a standardized self-report questionnaire. We will extract disease and  
38 medical care-related characteristics (tumor entity, tumor stage, time since diagnosis and anticancer  
39 and psychopharmacological treatments) from patients' medical charts. We will further review  
40 patients' medical charts regularly for record of deceased patients and extraction of medical care  
41 data. For post-bereavement assessment, we will approach caregivers of deceased patients 3 months  
42 after a patient's death. We will conduct follow-up assessments via mail, telephone or upon patients'  
43 and caregivers' appointments for medical treatment at the cancer centres. For non-responder  
44 analyses, we will collect basic demographic and medical data from non-participants on a voluntary  
45 basis. The COVID-19-pandemic has led to limited access of caregivers to oncological treatment  
46 facilities. We will adapt the recruitment strategy accordingly and approach caregivers via phone upon  
47 the patient's approval.

## Measures

Table 1 shows self-report questionnaires and observer-rated instruments that will be completed by patients, caregivers or both.

### *Existential distress*

We will assess *death anxiety* in patients and caregivers using the *Death and Dying Distress Scale (DADDs)*. [21, 22] The 15-item scale measures clinically significant distress with regard to concerns surrounding the patient's death. This includes psychosocial and existential concerns about missed opportunities and the loss of time, past regrets and uncertainty about the future and the burden of death on others. It also measures practical concerns about the process of dying, including fears about dying alone or with suffering or worries about its timing. Items are scored on a 6-point Likert-scale ranging from 0 (no distress) to 5 (extreme distress). The sum score ranges from 0 to 75; scores  $\geq 45$  indicate moderate to high levels death anxiety. A modified version of the scale validated in German cancer patients showed excellent internal consistency (Cronbach's  $\alpha = 0.91$ ). [61] The caregiver version (unpublished) will be validated in the current study (C. Lo, personal communication, May 2020).

We will assess *demoralization* in patients and caregivers using the *Demoralization Scale-II (DS-II)*. [62, 63] The 16-item revised scale measures feelings of hopelessness and helplessness, and loss of meaning and purpose on two subscales (Meaning and Purpose, Distress and Coping Ability). Items are scored on a 3-point Likert-scale ranging from 0 (never) to 2 (often). Sum scores range from 0 to 32 for the total scale and from 0 to 16 for the subscales. The subscales and the total scale (Cronbach's  $\alpha = 0.89$ ) show good internal consistency. [62] The original scale [64] was validated in German cancer patients and showed good internal consistency (Cronbach's  $\alpha = 0.84$ ). [65] Although the scale is mostly used in cancer patients, it has been validated in different non-cancer populations and is applicable to caregivers.

We will assess *perceived relatedness* for patients and caregivers using the subscales *Dependence and Relatedness* of the *Depressive Experiences Questionnaire (DEQ)*. [66, 67] The 18- and 8-item scales are distinct aspects of an overall Dependency factor. They measure interpersonal issues like feelings of helplessness, fear of rejection, and feelings of loneliness due to disruption in a relationship. Items are scored on a 7-point Likert-scale ranging from 1 (disagree) to 7 (agree). According to the procedure described by Blatt et al., [68] we calculate scores based on the factor scores derived from a confirmatory factor analysis. The authors provided us with a syntax for SPSS (D. Zuroff, personal

1  
2  
3 communication, May 2020). The German version was validated in clinical and non-clinical samples  
4 and showed acceptable to good internal consistency (Cronbach's  $\alpha = 0.74$  to  $0.83$ ).[69, 70]

5  
6 We will assess *end-of-life-preparation and adjustment processes* in patients and caregivers using the  
7 *Loss Orientation and Life Engagement in Advanced Cancer Scale (LOLES)*. [71] The 20-item scale  
8  
9  
10  
11  
12  
13  
14  
15  
16  
17  
18  
19  
20  
21  
22  
23  
24  
25  
26  
27  
28  
29  
30  
31  
32  
33  
34  
35  
36  
37  
38  
39  
40  
41  
42  
43  
44  
45  
46  
47  
48  
49  
50  
51  
52  
53  
54  
55  
56  
57  
58  
59  
60  
measures preoccupation with death and dying, engagement in personally meaningful activities, and  
coping efforts including end-of-life preparation, distraction and hoping for a positive outcome. Items  
are scored on a 5-point Likert-scale ranging from 0 (not at all) to 4 (nearly all the time). High scores  
indicate high levels of loss orientation, life engagement, and coping efforts, respectively. The pilot  
version of the scale showed good internal consistency (Cronbach's  $\alpha = 0.80$  to  $0.88$ ). A parallel  
caregiver version (unpublished) will be validated in the present study.

We will assess *dignity-related distress* in patients using the *Sense of Dignity Item (SDI)*. [25] The item  
measures subjective loss of dignity on a 7-point Likert-scale ranging from 0 (no sense of loss of  
dignity) to 6 (extreme sense of loss of dignity). A score  $> 3$  indicates a fractured sense of dignity.  
Further, we will assess dignity- and *identity-related concerns* using the *Patient Dignity Inventory  
(PDI)*. [72] The 25-item scale measures the loss of sense of dignity in patients with terminal illness. For  
our purposes, we will only use the subscales assessing physical symptom distress and body image  
and loss of autonomy, according to the validated German version. [73] Items are scored on a 5-point  
Likert-scale ranging from 1 (not a problem) to 5 (overwhelming problem). Scores  $\geq 3$  indicate that a  
relevant problem is experienced. The German version of the scale showed excellent internal  
consistency (Cronbach's  $\alpha = 0.96$ ). [73]

We will assess *demoralization* in patients and caregivers using the *Structured Interview for  
Psychological Adjustment and Demoralization* developed by Kissane and colleagues (Bobevski I. &  
Kissane, D., 2019, Structured Interview for Psychological Adjustment and Demoralisation,  
unpublished clinical interview). The 36-item interview measures participants' sense of coping with  
any stressful event, including cancer and its treatment, with regard to level of avoidance, symptoms  
of demoralization, preoccupation, value of life, and functional impairment. It also assesses suicidal  
ideation. Items are answered with yes or no. The diagnostic algorithm is based on the proposed  
criteria for adjustment disorder with demoralization. [23, 74]

As part of the structured interview, patients' and caregivers *goals of care* and recall of *goals of care  
discussions* [75] with physicians will be assessed.

We will assess *anticipatory grief* in caregivers using the short version of the *Marwit–Meuser  
Caregiver Grief Inventory (MM-CGI-SF)*. [76] The 18-item scale measures pre-death grief on the  
subscales Personal Sacrifice and Burden, Heartfelt Sadness and Longing, and Worry and Felt Isolation.  
Items are scored on a 5-point Likert-scale ranging from 1 (strongly disagree) to 5 (strongly agree).



1  
2  
3 Three items, which referred to aspects specific to dementia, were adapted to cancer populations (S.  
4 Marwit, personal communication, June 2020). The total sum score ranges from 0 to 90. High scores  
5 indicate a higher level of grief level. Originally developed for caregivers of patients with Alzheimer's  
6 disease, its psychometric properties have been confirmed among caregivers of patients with cancer.  
7  
8 The total scale and the subscales showed good to excellent internal consistency (Cronbach's  $\alpha = 0.80$   
9 to 0.90).

10  
11  
12  
13 We will assess *guilt* in caregivers using the *Caregiver Guilt Questionnaire (CGQ)*.<sup>[77]</sup> The 22-item  
14 scale measures aspects of guilt experienced by caregivers on the subscales *Guilt about doing wrong*  
15 *by the care recipient*, *Guilt about not rising to the occasion as caregivers*, *Guilt about self-care*, *Guilt*  
16 *about neglecting other relatives*, and *Guilt about having negative feelings towards other people*.  
17  
18 Items are scored on a 5-point Likert-scale ranging from 0 (never) to 4 (always or most always). The  
19 total sum score ranges from 0 to 88. High scores indicate greater guilt. The total scale and the  
20 subscales showed acceptable to good internal consistency (Cronbach's  $\alpha = 0.63$  to 0.89).  
21  
22  
23  
24  
25  
26  
27

### 28 *End-of-life outcomes and prevalence of mental disorders*

29  
30 Information about *aggressiveness of care* will include receipt of chemotherapy in the last two weeks  
31 of life, emergency hospital admissions or intensive-care treatment during the last month of life<sup>[78]</sup>  
32 will be obtained from medical chart reviews for deceased patients. Further, we will document the  
33 uptake and duration of specialized palliative care or hospice services received and place of death. We  
34 will further assess documentation of end-of-life care discussions as well as medical orders for life  
35 sustaining treatment in the electronic health record.  
36  
37  
38  
39

40  
41 We will assess the prevalence of *mental disorders* including affective and anxiety disorders,  
42 posttraumatic stress disorder and adjustment disorder in patients and caregivers using the  
43 *Structured Clinical Interview for DSM-5 (SCID-5)*.<sup>[79]</sup> The semi-structured clinical interview measures  
44 mental disorders according to the DSM-5.<sup>[80]</sup> The German version showed acceptable internal  
45 consistency (Cronbach's  $\alpha \geq 0.70$ ).<sup>[81]</sup>  
46  
47  
48

49  
50 We will assess the prevalence of *adjustment disorders* according to ICD-11 in patients and caregivers  
51 using the new *Adjustment Disorder Module of the Composite International Diagnostic Interview*  
52 *(CIDI)*.<sup>[82]</sup> The structured interview measures the disorder according to the revised conceptualization  
53 in the International Classification of Diseases-11 (ICD-11). If participants name one or more stressful  
54 events during the past 12 months, they are asked about accompanying symptoms, duration of  
55 symptoms and impairments in their professional or social life. The diagnosis will be determined  
56 according to the criteria described by Perkonig and colleagues.<sup>[82]</sup>  
57  
58  
59  
60

1  
2  
3 We will assess the *desire for hastened death* in patients using the short form of the *Schedule of*  
4 *Attitudes Toward Hastened Death (SAHD-A)*.<sup>[83]</sup> The 6-item version of the original instrument<sup>[84]</sup>  
5 measures a wish to die sooner than might occur by natural disease. Items are scored with either  
6 being true (1) or false (0). For the total score, we count the number of endorsed items, ranging from  
7 0 to 6. High scores indicate high levels of desire for hastened death. We selected the six relevant  
8 items out of the validated German version (SAHD-D).<sup>[85]</sup> The short version showed good internal  
9 consistency (Cronbach's  $\alpha = 0.83$ ).<sup>[83]</sup>

10  
11 We will assess *suicidal ideation* in patients and caregivers using the *Beck Scale for Suicidal Ideation*  
12 *(BSS)*.<sup>[86, 87]</sup> The 21-item scale measures the intensity of suicidal tendencies with three statements  
13 for each item (e.g., 0 = I have a moderate to strong wish to live, 1 = I have a weak wish to live, 2 = I  
14 have no wish to live). The first five items can be used to screen for suicidal ideation. If items 4 and 5,  
15 measuring active and passive suicidal ideation, are scored with 0, participants are asked to skip to the  
16 items regarding previous suicidal attempts. The sum score ranges from 0 to 38 for the total scale and  
17 from 0 to 10 for the screening score. Higher values indicate stronger suicidal tendencies. The German  
18 version showed high internal consistency for the screening items (Cronbach's  $\alpha = 0.89$ ) and the total  
19 scale (Cronbach's  $\alpha = 0.88$ ).<sup>[87]</sup>

20  
21 We will assess *complicated grief* in caregivers after the patient's death using the *Inventory of*  
22 *Complicated Grief (ICG)*.<sup>[88]</sup> The 19-item scale measures symptoms of complicated grief on based on  
23 the originally proposed criteria for DSM-5<sup>[80]</sup> on a single factor. Items are scored on a 5-point Likert-  
24 scale ranging from 0 (never) to 4 (always). The sum score ranges from 0 to 76. Scores  $\geq 25$  indicate  
25 experiences of complicated grief. The German version of the scale shows good internal consistency  
26 (Cronbach's  $\alpha = 0.87$ ).<sup>[89]</sup>

27  
28 We will assess the *quality of dying and death* from the caregivers' perspective using the *Quality of*  
29 *Dying and Death Questionnaire (QODD)*.<sup>[90]</sup> After a patient's death, the questionnaire is usually  
30 administered as an interview, asking caregivers to evaluate the patients' dying experience during  
31 their last seven days or last month. In this study, we will administer a short 20-item version<sup>[91]</sup> as a  
32 self-report instrument. Caregivers indicate how they would rate each experience for the patient on a  
33 scale from 0 (terrible experience) to 10 (almost perfect experience). The score is calculated by adding  
34 up the ratings and dividing them by the number of items answered. To obtain a total score between  
35 0 and 100, the result is multiplied by 10. Higher scores indicate a better quality of the dying  
36 experience. The adapted German version showed good internal consistency (Cronbach's  
37  $\alpha = 0.85$ ).<sup>[92]</sup>

38  
39  
40  
41  
42  
43  
44  
45  
46  
47  
48  
49  
50  
51  
52  
53  
54  
55  
56  
57  
58  
59  
60  
*Symptom burden and resources*

1  
2  
3 We will assess *symptom burden* in patients using the *Memorial Symptom Assessment Scale (MSAS-*  
4 *SF)*.<sup>[93]</sup> The 28-item scale measures the frequency and the distress of physical symptoms that may  
5 occur as a result of cancer or its treatment. Items are scored on a five-point Likert-scale ranging from  
6 0 (not at all distressed) to 4 (very much distressed). For the total score, we count the number of  
7 physical symptoms reported by the patients. The scale shows good internal consistency (Cronbach's  
8  $\alpha = 0.87$ ).

9  
10 We will assess self-reported symptoms of *depression* and *anxiety* in patients and caregivers using the  
11 *Patient Health Questionnaire (PHQ-9)*<sup>[94]</sup> and the *Generalized Anxiety Disorder Questionnaire*  
12 *(GAD-7)*.<sup>[95]</sup> Both instruments measure symptoms of depression and anxiety based on DSM-5  
13 criteria. Items are scored on a four-point Likert-scale ranging from 0 (not at all) to 3 (nearly every  
14 day). Sum scores range from 0 to 27 and 0 to 21, respectively. Scores  $\geq 10$  indicate moderate, scores  
15  $\geq 15$  severe depression or anxiety. Both German versions showed good internal consistency  
16 (Cronbach's  $\alpha = 0.89$ ).<sup>[96, 97]</sup>

17  
18 We will assess *meaning in life* and *crisis of meaning* in patients and caregivers using the subscales of  
19 the *Sources of Meaning and Meaning in Life Questionnaire (LeBe)*.<sup>[98]</sup> The 5-item subscales measure  
20 perceived meaningful fulfillment and crisis of meaning. Items are scored on a 6-point Likert-scale  
21 ranging from 0 (totally disagree) to 5 (totally agree). Sum scores for each subscale range from 0 to 25.  
22 High scores indicate a greater sense of meaningfulness or a greater lack of meaning, respectively.  
23 Both scales showed acceptable to good internal consistency (Cronbach's  $\alpha = 0.72$  to  $0.87$ ).

### 24 25 26 27 28 29 30 31 32 33 34 35 36 37 38 39 *Support needs*

40 We will assess the *need for and utilization of psychosocial support* for existential distress in patients  
41 and caregivers using a standardized self-report questionnaire. It measures whether participants are  
42 still thinking about the existential concerns mentioned in the overall questionnaire, including fear of  
43 death and dying, fear of suffering, sense of pointlessness or hopelessness, sense of loss of dignity,  
44 preparation for the end of life, anticipatory grief, and existential loneliness. It will further assess  
45 whether participants wish to receive support dealing with this subject and who would be their  
46 preferred source of support (partner, family, friends, treating physician,  
47 psychologist/psychotherapist, other patients or caregivers). Moreover, participants will be asked  
48 whether they have previously utilized psychosocial support services.

### 49 50 51 52 53 54 55 56 57 58 **Statistical methods**

#### 59 60 *Power calculation*

1  
2  
3 To determine the relative risk for a binary end-of-life outcome after 12 months, we base our sample  
4 size calculation on a multiple logistic regression model. The model includes existential distress at  
5 baseline and the covariates age, gender, and socioeconomic status. Because the test statistic in  
6 logistic regression analysis is based on a  $\chi^2$ -distribution, the number of degrees of freedom (df) is  
7 equal to the number of regression weights in the model. Accordingly, we calculate the required  
8 sample size to reliably estimate the model by multiplying the minimum number of observations  
9 needed per df ( $n = 15$ ) with the number of df ( $df = 4$ ) and dividing the product by the ratio of positive  
10 events expected for the binary outcomes.[99] To predict receipt of aggressive treatment, we use the  
11 mean frequency reported by the German studies of Dasch et al.[52] (38%) and Radbruch et al.[53]  
12 (10%). Thus, we require a sample of  $n = \frac{15 * 4}{0.24} = 250$  for our analyses at 12-month follow-up. Based  
13 on previous experiences, we expect a drop-out rate of 50% due to death or loss of interest in  
14 participation[100] resulting in a required sample size of  $n=500$  at baseline.

### 25 26 *Statistical analysis*

27  
28 We will calculate descriptive statistics to determine sample and medical characteristics as well as the  
29 prevalence of existential distress, mental disorders and palliative care outcomes. We will estimate  
30 frequencies with 95% confidence intervals. To analyse the impact of existential distress at baseline  
31 on binary and continuous end-of-life and palliative care outcomes after 12 months, we conduct  
32 multiple linear and logistic regression. After testing for multicollinearity, we will control for  
33 demographic, physical and psychosocial variables. Analyses will be conducted separately for patients  
34 and caregivers.

35  
36 We will analyse the longitudinal trajectory of existential distress across the 12-month study period  
37 using growth mixture models. These models estimate distinct groups of existential distress  
38 trajectories based on a structural equation-modelling framework. The expected longitudinal dropout  
39 of patients with a prognosis of less than 12 months will be handled by full information maximum  
40 likelihood estimation.[101] We will use latent class analysis to explore whether the measured  
41 existential concerns form distinct types of existential distress. If more than 5% of the observed values  
42 are missing, we will replace missing data using multiple imputation. Existential distress may be higher  
43 among caregivers of patients who are physically too weak to participate and close to death. We will  
44 account for this effect by including patient participation as a control variable in caregiver models. We  
45 will perform statistical analyses in SPSS[102] and RStudio with R.[103, 104]

### 56 57 58 59 60 *Patient and public involvement*

1  
2  
3 The research questions and outcome measures are based on previous findings on concerns of  
4 patients with advanced cancer and their caregivers as well as patient- and caregiver-centered health  
5 care outcomes. Patients or the public were not involved in the design of the study. Patients and their  
6 caregivers are involved through completion of self-report questionnaires and interviews. We inform  
7 patients and caregivers that they are provided with the study results upon request.  
8  
9  
10  
11  
12  
13

### 14 ***Ethics and dissemination***

15  
16 The study was approved by the institutional research ethics committee (Lokale Psychologische  
17 Ethikkommission am Zentrum für Psychosoziale Medizin, reference number LPEK-0177). Informed  
18 consent will be obtained from all individual participants included in the study or their legal guardians.  
19 All procedures performed in this study are in accordance with the 1964 Helsinki Declaration and its  
20 later amendments. Results of this study will be presented at scientific conferences and published in  
21 peer-reviewed journals. Other forms of dissemination will include sharing results on the  
22 psychometric properties of the structured demoralization interview with international research  
23 groups to further examine demoralization as a diagnostic category as proposed by Kissane et and  
24 colleagues.[74] Dissemination will further include communication with health care professionals  
25 providing psychosocial treatment for patients and caregivers. Study progress will be regularly  
26 updated on ClinicalTrials.gov.  
27  
28  
29  
30  
31  
32  
33  
34  
35  
36  
37

### 38 ***Strengths and limitations***

39 This longitudinal study will provide unique systematic knowledge about patients' and caregivers'  
40 existential concerns. The empirical data will allow for conclusions concerning frequency and course  
41 of existential distress throughout one year. There is a need for quantitative studies focusing explicitly  
42 on existential concerns of caregivers, who are sometimes referred to as 'hidden patients' whose  
43 distress tends to be overlooked.[105] The recruitment strategy will allow enrollment of a large,  
44 heterogeneous sample of patients with advanced cancer from a range of clinics and treatment  
45 facilities. Limitations include potentially high dropout rates due to patients' physical decline or death  
46 within the study period. Heterogeneous patient and caregiver samples will limit subgroup-specific  
47 interpretations. Despite these limitations, the extensive assessment of psychological distress in a  
48 potentially highly distressed and understudied sample will contribute to the recognition of existential  
49 distress in patients and caregiver populations and to development of targeted interventions. Profiles  
50 of existential distress may be applied by clinicians from multiple professions and help to address  
51 existential concerns effectively.  
52  
53  
54  
55  
56  
57  
58  
59  
60

## References

- 1 Henley SJ, Thomas CC, Lewis DR, et al. Annual report to the nation on the status of cancer, part II: Progress toward Healthy People 2020 objectives for 4 common cancers. *Cancer* 2020;126(10):2250–66. doi:10.1002/cncr.32801 [published Online First: 12 March 2020].
- 2 Barnes B, Kraywinkel K, Nowossadeck E, et al. Bericht zum Krebsgeschehen in Deutschland 2016 2016. Available at: <https://edoc.rki.de/handle/176904/3264>.
- 3 Mehnert A, Brähler E, Faller H, et al. Four-week prevalence of mental disorders in patients with cancer across major tumor entities. *J Clin Oncol* 2014;32(31):3540–46.
- 4 Mitchell AJ, Chan M, Bhatti H, et al. Prevalence of depression, anxiety, and adjustment disorder in oncological, haematological, and palliative-care settings: a meta-analysis of 94 interview-based studies. *Lancet Oncol* 2011;12(2):160–74.
- 5 Areia NP, Fonseca G, Major S, et al. Psychological morbidity in family caregivers of people living with terminal cancer: Prevalence and predictors. *Palliat Support Care* 2018:1–8 (accessed 7 Apr 2018).
- 6 Costa-Requena G, Cristófol R, Cañete J. Caregivers' morbidity in palliative care unit: Predicting by gender, age, burden and self-esteem. *Support Care Cancer* 2012;20(7):1465–70 (accessed 7 Apr 2018).
- 7 Williams A-L, McCorkle R. Cancer family caregivers during the palliative, hospice, and bereavement phases: A review of the descriptive psychosocial literature. *Palliat Support Care* 2011;9(3):315–25.
- 8 Ullrich A, Ascherfeld L, Marx G, et al. Quality of life, psychological burden, needs, and satisfaction during specialized inpatient palliative care in family caregivers of advanced cancer patients. *BMC Palliative Care* 2017;16(1):31.
- 9 Saunders CM. The Management of terminal malignant disease, 2nd edn. London: Edward Arnold 1984.
- 10 Cassel EJ. The nature of suffering and the goals of medicine. *N. Engl. J. Med.* 1982;306(11):639–45.
- 11 Weisman AD, Worden JW. The existential plight in cancer: significance of the first 100 days. *Int J Psychiatry Med* 1977;7(1):1–15.
- 12 Grech A, Marks A. Existential Suffering Part 1: Definition and Diagnosis #319. *J Palliat Med* 2017;20(1):93–94.
- 13 Vehling S, Kissane DW. Existential distress in cancer: alleviating suffering from fundamental loss and change. *Psycho-Oncology* 2018;27(11):2525–30.
- 14 Breitbart W. Spirituality and meaning in supportive care: spirituality- and meaning-centered group psychotherapy interventions in advanced cancer. *Support Care Cancer* 2002;10(4):272–80.
- 15 LeMay K, Wilson KG. Treatment of existential distress in life threatening illness: A review of manualized interventions. *Clin Psychol Rev* 2008;28(3):472–93.
- 16 Best M, Aldridge L, Butow PN, et al. Conceptual analysis of suffering in cancer: a systematic review. *Psycho-Oncology* 2015;24(9):977–86. 25754062 (accessed 16 Mar 2015).
- 17 Kissane DW. The relief of existential suffering. *Arch Intern Med* 2012;172(19):1501–05.
- 18 Hensch I, Danielson E. Existential concerns among patients with cancer and interventions to meet them: an integrative literature review. *Psycho-Oncology* 2009;18(3):225–36. doi:10.1002/pon.1424.
- 19 Boston P, Bruce A, Schreiber R. Existential suffering in the palliative care setting: an integrated literature review. *J Pain Symptom Manag* 2011;41(3):604–18.
- 20 Cherny NI, Coyle N, Foley KM. Suffering in the advanced cancer patient: a definition and taxonomy. *J Palliat Care* 1994;10(2):57–70.

- 1  
2  
3 21 Krause S, Rydall A, Hales S, et al. Initial validation of the Death and Dying Distress Scale for the  
4 assessment of death anxiety in patients with advanced cancer. *J Pain Symptom Manag*  
5 2015;49(1):126–34.  
6  
7 22 Lo C, Hales S, Zimmermann C, et al. Measuring death-related anxiety in advanced cancer:  
8 preliminary psychometrics of the Death and Dying Distress Scale. *Journal of Pediatric*  
9 *Hematology/Oncology* 2011;33:140–45.  
10  
11 23 Kissane DW, Clarke DM, Street AF. Demoralization syndrome - a relevant psychiatric diagnosis  
12 for palliative care. *J Palliat Care* 2001;17(1):12–21.  
13  
14 24 Lo C, Panday T, Zeppieri J, et al. Preliminary psychometrics of the Existential Distress Scale in  
15 patients with advanced cancer. *Eur J Cancer Care* 2017;26(6):e12597.  
16  
17 25 Chochinov HM, Hack T, Hassard T, et al. Dignity in the terminally ill: a cross-sectional, cohort  
18 study. *The Lancet* 2002;360(9350):2026–30.  
19  
20 26 Grassi L, Figueiredo JM de. Advances in the Understanding of Demoralization in Oncology and  
21 Palliative Care. *Psycho-Oncol.* 2018;12(2):99–108.  
22  
23 27 Robinson S, Kissane DW, Brooker J, et al. A systematic review of the demoralization syndrome  
24 in individuals with progressive disease and cancer: a decade of research. *J Pain Symptom*  
25 *Manag* 2015;49(3):595–610.  
26  
27 28 Tecuta L, Tomba E, Grandi S, et al. Demoralization: a systematic review on its clinical  
28 characterization. *Psychol Med* 2015;45(4):673–91.  
29  
30 29 Vehling S, Malfitano C, Shnall J, et al. A concept map of death-related anxieties in patients with  
31 advanced cancer. *BMJ Support Palliat Care* 2017;7:427–34 (accessed 24 Aug 2017).  
32  
33 30 Chochinov HM, Kristjanson LJ, Hack TF, et al. Burden to others and the terminally ill. *J Pain*  
34 *Symptom Manag* 2007;34(5):463–71.  
35  
36 31 Vehling S, Mehnert A. Symptom burden, loss of dignity, and demoralization in patients with  
37 cancer: a mediation model. *Psycho-Oncology* 2014;23(3):283–90.  
38  
39 32 Wentlandt K, Burman D, Swami N, et al. Preparation for the end of life in patients with  
40 advanced cancer and association with communication with professional caregivers. *Psycho-*  
41 *Oncology* 2012;21(8):868–76. 21648015 (accessed 25 Feb 2015).  
42  
43 33 Morita T, Kawa M, Honke Y, et al. Existential concerns of terminally ill cancer patients receiving  
44 specialized palliative care in Japan. *Support Care Cancer* 2004;12(2):137–40.  
45  
46 34 Applebaum AJ, Farran CJ, Marziliano AM, et al. Preliminary study of themes of meaning and  
47 psychosocial service use among informal cancer caregivers. *Palliat Support Care*  
48 2014;12(2):139–48.  
49  
50 35 Stenberg U, Ruland CM, Miaskowski C. Review of the literature on the effects of caring for a  
51 patient with cancer. *Psycho-Oncology* 2010;19(10):1013–25 (accessed 8 Apr 2018).  
52  
53 36 Eifert EK, Adams R, Dudley W, et al. Family Caregiver Identity: A Literature Review. *American*  
54 *Journal of Health Education* 2015;46(6):357–67.  
55  
56 37 Reblin M, Small B, Jim H, et al. Mediating burden and stress over time: Caregivers of patients  
57 with primary brain tumor. *Psycho-Oncology* 2018;27(2):607–12. doi:10.1002/pon.4527  
58 [published Online First: 31 August 2017].  
59  
60 38 Nielsen MK, Neergaard MA, Jensen AB, et al. Preloss grief in family caregivers during end-of-life  
cancer care: A nationwide population-based cohort study. *Psycho-Oncology* 2017;26(12):2048–  
56.  
39  
40 39 Applebaum AJ, Kryza-Lacombe M, Buthorn J, et al. Existential distress among caregivers of  
patients with brain tumors: a review of the literature. *NOPRAC* 2016;3(4):232–44.  
41  
42 40 Badr H, Smith CB, Goldstein NE, et al. Dyadic psychosocial intervention for advanced lung  
cancer patients and their family caregivers: Results of a randomized pilot trial. *Cancer*  
2015;121(1):150–58 (accessed 7 Apr 2018).

- 1  
2  
3 41 Badr H, Taylor CLC. Social constraints and spousal communication in lung cancer. *Psycho-Oncology* 2006;15(8):673–83 (accessed 7 Apr 2018).
- 4  
5 42 Manne S, Badr H. Intimacy and relationship processes in couples' psychosocial adaptation to  
6 cancer. *Cancer* 2008;112(11 Suppl):2541–55.
- 7  
8 43 Philipp R, Mehnert A, Müller V, et al. Perceived relatedness, death acceptance, and  
9 demoralization in patients with cancer. *Support Care Cancer* 2020;28:2693–700 (accessed 28  
10 Jan 2020).
- 11  
12 44 Chiu Y-W, Huang C-T, Yin S-M, et al. Determinants of complicated grief in caregivers who cared  
13 for terminal cancer patients. *Support Care Cancer* 2010;18(10):1321–27.
- 14  
15 45 Lobb EA, Kristjanson LJ, Aoun SM, et al. Predictors of complicated grief: A systematic review of  
16 empirical studies. *Death Stud* 2010;34(8):673–98.
- 17  
18 46 Mystakidou K, Tsilika E, Parpa E, et al. Caregivers of advanced cancer patients: Feelings of  
19 hopelessness and depression. *Cancer Nurs* 2007;30(5):412–18.
- 20  
21 47 Fang C-K, Chang M-C, Chen P-J, et al. A correlational study of suicidal ideation with  
22 psychological distress, depression, and demoralization in patients with cancer. *Support Care  
23 Cancer* 2014;22(12):3165–74.
- 24  
25 48 Robinson S, Kissane DW, Brooker J, et al. The relationship between poor quality of life and  
26 desire to hasten death: A multiple mediation model examining the contributions of depression,  
27 demoralization, loss of control, and low self-worth. *J Pain Symptom Manag* 2017;53(2):243–49  
28 (accessed 24 Oct 2016).
- 29  
30 49 Vehling S, Kissane DW, Lo C, et al. The association of demoralization with mental disorders and  
31 suicidal ideation in patients with cancer. *Cancer* 2017;123(17):3394–401 (accessed 14 Jun  
32 2017).
- 33  
34 50 Li M, Watt S, Escaf M, et al. Medical Assistance in Dying - Implementing a hospital-based  
35 program in Canada. *N. Engl. J. Med.* 2017;376(21):2082–88.
- 36  
37 51 Lichtenthal WG, Nilsson M, Zhang B, et al. Do rates of mental disorders and existential distress  
38 among advanced stage cancer patients increase as death approaches? *Psycho-Oncology*  
39 2009;18(1):50–61. doi:10.1002/pon.1371.
- 40  
41 52 Dasch B, Kalies H, Feddersen B, et al. Care of cancer patients at the end of life in a German  
42 university hospital: A retrospective observational study from 2014. *PLoS One*  
43 2017;12(4):e0175124 (accessed 7 Apr 2018).
- 44  
45 53 Radbruch L, Andersohn F, Walker J. Palliative care: oversupply curative–undersupply palliative?  
46 Analysis of selected treatments at the end of life. Bertelsmann Foundation 2015. Available at:  
47 [https://www.bertelsmann-  
48 stiftung.de/fileadmin/files/BSt/Publikationen/GrauePublikationen/Studie\\_VV\\_\\_FCG\\_Ueber-  
49 Unterversorgung-palliativ.pdf](https://www.bertelsmann-stiftung.de/fileadmin/files/BSt/Publikationen/GrauePublikationen/Studie_VV__FCG_Ueber-Unterversorgung-palliativ.pdf) Accessed April 08, 2018.
- 50  
51 54 Steinhauser KE, Fitchett G, Handzo GF, et al. State of the Science of Spirituality and Palliative  
52 Care Research Part I: Definitions, Measurement, and Outcomes. *J Pain Symptom Manag*  
53 2017;54(3):428–40 (accessed 26 Mar 2018).
- 54  
55 55 Phelps AC, Maciejewski PK, Nilsson M, et al. Religious coping and use of intensive life-  
56 prolonging care near death in patients with advanced cancer. *JAMA* 2009;301(11):1140–47.
- 57  
58 56 Greer JA, Jacobs JM, El-Jawahri A, et al. Role of Patient Coping Strategies in Understanding the  
59 Effects of Early Palliative Care on Quality of Life and Mood. *J Clin Oncol* 2017;JCO2017737221  
60 (accessed 29 Nov 2017).
- 57  
58 57 Nipp RD, Greer JA, El-Jawahri A, et al. Coping and Prognostic Awareness in Patients With  
59 Advanced Cancer. *J Clin Oncol* 2017;35(22):2551–57.



- 1  
2  
3 58 Applebaum AJ, Stein EM, Lord-Bessen J, et al. Optimism, social support, and mental health  
4 outcomes in patients with advanced cancer. *Psycho-Oncology* 2014;23(3):299–306.  
5 doi:10.1002/pon.3418 [published Online First: 7 October 2013].  
6  
7 59 Boston PH, Mount BM. The caregiver's perspective on existential and spiritual distress in  
8 palliative care. *J Pain Symptom Manag* 2006;32(1):13–26.  
9  
10 60 Bates AT. Addressing existential suffering. *BC Medical Journal* 2016;58(5):268–73 (accessed 7  
11 Apr 2018).  
12  
13 61 Engelmann D, Scheffold K, Friedrich M, et al. Death-Related Anxiety in Patients With Advanced  
14 Cancer: Validation of the German Version of the Death and Dying Distress Scale. *J Pain*  
15 *Symptom Manag* 2016;52(4):582–87 (accessed 26 Oct 2016).  
16  
17 62 Robinson S, Kissane DW, Brooker J, et al. Refinement and revalidation of the demoralization  
18 scale: The DS-II-internal validity. *Cancer* 2016;doi:10.1002/cncr.30015.  
19  
20 63 Robinson S, Kissane DW, Brooker J, et al. Refinement and revalidation of the demoralization  
21 scale: The DS-II-external validity. *Cancer* 2016(14):2260–67.  
22  
23 64 Kissane DW, Wein S, Love A, et al. The Demoralization Scale: a report of its development and  
24 preliminary validation. *J Palliat Care* 2004;20(4):269–76.  
25  
26 65 Mehnert A, Vehling S, Hoecker A, et al. Demoralization and depression in patients with  
27 advanced cancer: validation of the German version of the demoralization scale. *J Pain Symptom*  
28 *Manag* 2011;42(5):768–76.  
29  
30 66 Blatt SJ, D'Affitti JP, Quinlan DM. Experiences of depression in normal young adults. *J Abnorm*  
31 *Psychol* 1976;85(4):383–89.  
32  
33 67 Blatt SJ, Zohar AH, Quinlan DM, et al. Subscales within the dependency factor of the Depressive  
34 Experiences Questionnaire. *J Pers Assess* 1995;64(2):319–39.  
35 <https://pubmed.ncbi.nlm.nih.gov/7722857/>.  
36  
37 68 Blatt SJ, al e. Dependency and self-criticism: Psychological dimensions of depression. *J Consult*  
38 *Clin Psychol* 1982;50(1):113–24.  
39  
40 69 Beutel ME, Wiltink J, Hafner C, et al. Dependence and self-criticism as a psychological  
41 dimension of depression: Validation of the German-language version of the Depressive  
42 Experience Questionnaire (DEQ). *Zeitschrift für klinische Psychologie, Psychiatrie und*  
43 *Psychotherapie* 2004;52:1–14.  
44  
45 70 Krieger T, Zimmermann J, Beutel ME, et al. Ein Vergleich verschiedener Kurzversionen des  
46 Depressive Experiences Questionnaire (DEQ) zur Erhebung von Selbstkritik und Abhängigkeit.  
47 *Diagnostica* 2014;60(3):126–39.  
48  
49 71 Vehling S, Gerstorff D, Schulz-Kindermann F, et al. The daily dynamics of loss orientation and life  
50 engagement in advanced cancer: a pilot study to characterize patterns of adaptation at the  
51 end-of-life. *Eur J Cancer Care* 2018;27(4):e12842.  
52  
53 72 Chochinov HM, Hassard T, McClement SE, et al. The patient dignity inventory: a novel way of  
54 measuring dignity-related distress in palliative care. *J Pain Symptom Manag* 2008;36(6):559–71.  
55  
56 73 Sautier LP, Vehling S, Mehnert A. Assessment of Patients' Dignity in Cancer Care: Preliminary  
57 Psychometrics of the German Version of the Patient Dignity Inventory (PDI-G). *J Pain Symptom*  
58 *Manag* 2014;47(1):181–88.  
59  
60 74 Kissane DW, Bobevski I, Gaitanis P, et al. Exploratory examination of the utility of  
demoralization as a diagnostic specifier for adjustment disorder and major depression. *Gen*  
*Hosp Psychiatry* 2017;doi:10.1016/j.genhosppsy.2017.01.007 (accessed 8 Feb 2017).  
75  
El-Jawahri A, Forst D, Fenech A, et al. Relationship Between Perceptions of Treatment Goals  
and Psychological Distress in Patients With Advanced Cancer. *J Natl Compr Canc Netw*  
2020;18(7):849–55.

- 1  
2  
3 76 Marwit SJ, Meuser TM. Development of a short form inventory to assess grief in caregivers of  
4 dementia patients. *Death Stud* 2005;29(3):191–205.
- 5 77 Losada A, Márquez-González M, Peñacoba C, et al. Development and validation of the  
6 Caregiver Guilt Questionnaire. *International Psychogeriatrics* 2010;22(4):650–60.  
7 [https://www.cambridge.org/core/services/aop-cambridge-](https://www.cambridge.org/core/services/aop-cambridge-core/content/view/E07CAA3C7A2E6D8761085ED3B7452B5A/S1041610210000074a.pdf/div-class-title-development-and-validation-of-the-caregiver-guilt-questionnaire-div.pdf)  
8 [core/content/view/E07CAA3C7A2E6D8761085ED3B7452B5A/S1041610210000074a.pdf/div-](https://www.cambridge.org/core/content/view/E07CAA3C7A2E6D8761085ED3B7452B5A/S1041610210000074a.pdf/div-class-title-development-and-validation-of-the-caregiver-guilt-questionnaire-div.pdf)  
9 [class-title-development-and-validation-of-the-caregiver-guilt-questionnaire-div.pdf](https://www.cambridge.org/core/content/view/E07CAA3C7A2E6D8761085ED3B7452B5A/S1041610210000074a.pdf/div-class-title-development-and-validation-of-the-caregiver-guilt-questionnaire-div.pdf).
- 10 78 Earle CC, Park ER, Lai B, et al. Identifying potential indicators of the quality of end-of-life cancer  
11 care from administrative data. *J Clin Oncol* 2003;21(6):1133–38.
- 12 79 First MB, Williams JBW, Karg RS, et al. Structured clinical interview for DSM-5 disorders: SCID-5-  
13 CV clinician version. Arlington, VA: American Psychiatric Association Publishing 2016.
- 14 80 American Psychiatric Association. Diagnostic and statistical manual of mental disorders (5th  
15 Ed): DSM-5, 5th edn. Washington DC: American Psychiatric Association 2013.
- 16 81 Beesdo-Baum K, Zaudig M, Wittchen H-U. Strukturiertes Klinisches Interview für DSM-5®-  
17 Störungen – Klinische Version. Göttingen: Hogrefe 2019.
- 18 82 Perkonig A, Lorenz L, Maercker A. Prevalence and correlates of ICD-11 adjustment disorder:  
19 Findings from the Zurich Adjustment Disorder Study. *Int J Clin Health Psychol* 2018;18(3):209–  
20 17.
- 21 83 Kolva E, Rosenfeld B, Liu Y, et al. Using item response theory (IRT) to reduce patient burden  
22 when assessing desire for hastened death. *Psychological Assessment* 2017;29(3):349–53  
23 (accessed 12 Mar 2018).
- 24 84 Rosenfeld B, Breitbart W, Galietta M, et al. The schedule of attitudes toward hastened death:  
25 Measuring desire for death in terminally ill cancer patients. *Cancer* 2000;88(12):2868–75.
- 26 85 Galushko M, Strupp J, Walisko-Waniek J, et al. Validation of the German version of the  
27 Schedule of Attitudes Toward Hastened Death (SAHD–D) with patients in palliative care. *Palliat*  
28 *Support Care* 2015;13(3):713–23. [https://www.cambridge.org/core/services/aop-cambridge-](https://www.cambridge.org/core/services/aop-cambridge-core/content/view/DB040D18D21513D9F9609D7D88490563/S1478951514000492a.pdf/div-class-title-validation-of-the-german-version-of-the-schedule-of-attitudes-toward-hastened-death-sahd-d-with-patients-in-palliative-care-div.pdf)  
29 [core/content/view/DB040D18D21513D9F9609D7D88490563/S1478951514000492a.pdf/div-](https://www.cambridge.org/core/content/view/DB040D18D21513D9F9609D7D88490563/S1478951514000492a.pdf/div-class-title-validation-of-the-german-version-of-the-schedule-of-attitudes-toward-hastened-death-sahd-d-with-patients-in-palliative-care-div.pdf)  
30 [class-title-validation-of-the-german-version-of-the-schedule-of-attitudes-toward-hastened-](https://www.cambridge.org/core/content/view/DB040D18D21513D9F9609D7D88490563/S1478951514000492a.pdf/div-class-title-validation-of-the-german-version-of-the-schedule-of-attitudes-toward-hastened-death-sahd-d-with-patients-in-palliative-care-div.pdf)  
31 [death-sahd-d-with-patients-in-palliative-care-div.pdf](https://www.cambridge.org/core/content/view/DB040D18D21513D9F9609D7D88490563/S1478951514000492a.pdf/div-class-title-validation-of-the-german-version-of-the-schedule-of-attitudes-toward-hastened-death-sahd-d-with-patients-in-palliative-care-div.pdf).
- 32 86 Beck AT, Steer RA. Beck Scale for Suicide ideation (BSS). Bloomington: Pearson 1993.
- 33 87 Kliem S, Brähler E. Beck-Suizidgedanken-Skala (BSS). Frankfurt am Main: Pearson Assessment  
34 2015.
- 35 88 Prigerson HG, Maciejewski PK, Reynolds CF, et al. Inventory of complicated grief: A scale to  
36 measure maladaptive symptoms of loss. *Psychiatry Res* 1995;59(1-2):65–79.
- 37 89 Lumbeck G, Brandstätter M, Geissner E. Erstvalidierung der deutschen Version des „Inventory  
38 of Complicated Grief“ (ICG-D). *Z Klin Psychol Psychother* 2012;41(4):243–48.
- 39 90 Curtis JR, Patrick DL, Engelberg RA, et al. A measure of the quality of dying and death. Initial  
40 validation using after-death interviews with family members. *J Pain Symptom Manag*  
41 2002;24(1):17–31.
- 42 91 Mah K, Hales S, Weerakkody I, et al. Measuring the quality of dying and death in advanced  
43 cancer: Item characteristics and factor structure of the Quality of Dying and Death  
44 Questionnaire. *Palliat Med* 2018.
- 45 92 Heckel M, Bussmann S, Stiel S, et al. Validation of the German Version of the Quality of Dying  
46 and Death Questionnaire for Informal Caregivers (QODD-D-Ang). *J Pain Symptom Manag*  
47 2015;50(3):402–13 (accessed 24 Mar 2017).
- 48 93 Chang VT, Hwang SS, Feuerman M, et al. The memorial symptom assessment scale short form  
49 (MSAS-SF). *Cancer* 2000;89(5):1162–71.
- 50  
51  
52  
53  
54  
55  
56  
57  
58  
59  
60

- 1  
2  
3 94 Kroenke K, Spitzer RL, Williams JB. The PHQ-9: validity of a brief depression severity measure. *J Gen Intern Med* 2001;16(9):606–13.
- 4  
5 95 Spitzer RL, Kroenke K, Williams JB, et al. A brief measure for assessing generalized anxiety disorder: the GAD-7. *Arch Intern Med* 2006;166(10):1092–97.
- 6  
7 96 Löwe B, Spitzer RL, Gräfe K, et al. Comparative validity of three screening questionnaires for DSM-IV depressive disorders and physicians diagnoses. *J Affect Disord* 2004;78(2):131–40 (accessed 24 Mar 2015).
- 8  
9  
10  
11 97 Löwe B, Decker O, Muller S, et al. Validation and standardization of the Generalized Anxiety Disorder Screener (GAD-7) in the general population. *Med Care* 2008;46(3):266–74.
- 12  
13 98 Schnell T, Becker P. LEBE - Fragebogen zu Lebensbedeutungen und Lebenssinn. Göttingen: Hogrefe 2007.
- 14  
15  
16 99 Dupont WD, Plummer WD. Power and sample size calculations. A review and computer program. *Control Clin Trials* 1990;11(2):116–28.
- 17  
18  
19 100 Spangenberg L, Zenger M, Garcia-Torres F, et al. Dimensionality, Stability and Validity of the Beck Hopelessness Scale in Cancer Patients Receiving Curative and Palliative Treatment. *J Pain Symptom Manag* 2016;51(3):615–22. 26654946 (accessed 8 Jan 2016).
- 20  
21  
22 101 Asendorpf JB, van de Schoot, R., Denissen, J. J. A., et al. Reducing bias due to systematic attrition in longitudinal studies: The benefits of multiple imputation. *International Journal of Behavioral Development* 2014;38(5):453–60 (accessed 8 Apr 2016).
- 23  
24  
25 102 IBM Corp. IBM SPSS Statistics for Windows, Version 25.0. Armonk, NY: IBM Corp. 2017.
- 26  
27 103 RStudio Team. RStudio: Integrated development for R. Boston, MA: RStudio, Inc. 2016.
- 28  
29 104 R Core Team. R: A language and environment for statistical computing. Vienna, Austria: R Foundation for Statistical Computing 2019.
- 30  
31 105 Hoerger M, Cullen BD. Early integrated palliative care and reduced emotional distress in cancer caregivers: Reaching the "hidden patients". *Oncologist* 2017;22(12):1419–20.
- 32  
33  
34  
35  
36  
37  
38  
39  
40  
41  
42  
43  
44  
45  
46  
47  
48  
49  
50  
51  
52  
53  
54  
55  
56  
57  
58  
59  
60

1  
2  
3 **Declarations**  
4

5 **Acknowledgements**  
6

7 We would like to thank David Kissane and Irene Bobevski for their valuable support regarding the  
8 assessment protocol.  
9

10  
11 **Author contributions**  
12

13 SV, MH, CB, and KO designed the study and coordinate the research project. RP, AK and SV wrote the  
14 first draft of the manuscript. MH, CB, KO, and UK revised it critically for important intellectual  
15 content. All authors approved the final version of the manuscript and agree to be accountable for all  
16 aspects of the study.  
17  
18  
19

20  
21 **Funding**  
22

23 This work is supported by the Max-Eder junior research group program of the German Cancer Aid  
24 (grant number 70113404).  
25

26  
27 **Competing interests**  
28

29 All authors declare no conflict of interest.  
30

31 **Word count:** 4,372  
32  
33  
34  
35  
36  
37  
38  
39  
40  
41  
42  
43  
44  
45  
46  
47  
48  
49  
50  
51  
52  
53  
54  
55  
56  
57  
58  
59  
60

1  
2  
3 **Figure 1.** Research model of existential distress in life-threatening illness. The figure shows a  
4 proposed taxonomy of existential concerns and their operationalization by existential distress  
5 concepts, as well as the potential association of these concepts with end-of-life outcomes among  
6 patients with advanced cancer and their caregivers.  
7  
8  
9  
10  
11  
12  
13  
14  
15  
16  
17  
18  
19  
20  
21  
22  
23  
24  
25  
26  
27  
28  
29  
30  
31  
32  
33  
34  
35  
36  
37  
38  
39  
40  
41  
42  
43  
44  
45  
46  
47  
48  
49  
50  
51  
52  
53  
54  
55  
56  
57  
58  
59  
60

For peer review only

**Table 1.** Self-report questionnaires and observer-rated instruments

|                                                                                   | Construct measured                                                                               | Patients | Caregivers |
|-----------------------------------------------------------------------------------|--------------------------------------------------------------------------------------------------|----------|------------|
| <b>Existential distress (predictor)</b>                                           |                                                                                                  |          |            |
| Death Anxiety and Distress Scale (DADDS)                                          | Death anxiety                                                                                    | ●        | ●          |
| Depressive Experiences Questionnaire (DEQ)<br>Subscales: Dependence, Relatedness  | Perceived relatedness                                                                            | ●        | ●          |
| Revised Loss Orientation and Life Engagement in Advanced Cancer Scale (LOLES)     | End-of-life preparation and adaptation                                                           | ●        | ●          |
| Dignity-Item (SDI)                                                                | Dignity-related distress                                                                         | ●        |            |
| Patient Dignity Inventory (PDI)                                                   | Dignity-related distress                                                                         | ●        |            |
| Demoralization Scale-II (DS-II)                                                   | Demoralization                                                                                   | ●        | ●          |
| Structured Interview for Psychological Adjustment and Demoralisation <sup>c</sup> | Demoralization, suicidal ideation                                                                | ●        | ●          |
| Marwit-Meuser Caregiver Grief Inventory (MM-CGI-SF) <sup>a</sup>                  | Anticipatory grief                                                                               |          | ●          |
| Caregiver Guilt Questionnaire (CGQ) <sup>a</sup>                                  | Caregiver guilt                                                                                  |          | ●          |
| <b>End-of-life outcomes and prevalence of mental disorders (outcome)</b>          |                                                                                                  |          |            |
| Disease- and medical care-related characteristics <sup>b</sup>                    | Aggressiveness of care                                                                           | ●        |            |
| Structured Clinical Interview for DSM-5 (SCID-5) <sup>c</sup>                     | Affective disorders<br>Anxiety disorders<br>Posttraumatic stress disorder<br>Adjustment disorder | ●        | ●          |
| Adjustment Disorder-CIDI – New Module (AjD-CIDI) <sup>c</sup>                     | ICD-11 adjustment disorder                                                                       | ●        | ●          |
| Schedule of Attitudes Toward Hastened Death – Short Form (SAHD-A)                 | Desire for hastened death                                                                        | ●        |            |
| Beck Scale for Suicide Ideation (BSS)                                             | Suicidal ideation                                                                                | ●        | ●          |
| Inventory of Complicated Grief (ICG) <sup>d</sup>                                 | Complicated grief                                                                                |          | ●          |
| Quality of Dying and Death Questionnaire (QODD) <sup>d</sup>                      | Quality of dying and death                                                                       |          | ●          |
| <b>Symptom burden and resources (covariate)</b>                                   |                                                                                                  |          |            |
| Memorial Symptom Assessment Scale – Short Form (MSAS-SF)                          | Physical symptom burden                                                                          | ●        |            |
| Patient Health Questionnaire-9 (PHQ-9)                                            | Symptoms of depression                                                                           | ●        | ●          |
| Generalized Anxiety Disorder Questionnaire-7 (GAD-7)                              | Symptoms of anxiety                                                                              | ●        | ●          |
| Sources of Meaning and Meaning in Life Questionnaire (LeBe)                       | Meaningfulness in life, crisis of meaning                                                        | ●        | ●          |
| <b>Support needs</b>                                                              |                                                                                                  |          |            |
| Structured questionnaire of psychosocial support needs for existential distress   | Need for and utilization of psychosocial support for existential distress                        | ●        | ●          |

<sup>a</sup>Not assessed after the patient's death<sup>b</sup>Assessed via medical chart review<sup>c</sup>Observer-rated interview<sup>d</sup>Assessed after the patients' death only

# Research model of patient and caregiver existential distress in life-threatening illness

BMJ Open

1  
2  
3  
4  
5  
6  
7  
8  
9  
10  
11  
12  
13  
14  
15  
16  
17  
18  
19  
20  
21  
22  
23  
24  
25  
26  
27  
28  
29  
30  
31  
32  
33  
34  
35  
36  
37  
38  
39  
40  
41

**Distressing existential concerns**

Fear of uncontrollable suffering

Sense of uncertainty

Grief or regret about missed opportunities

Loneliness and isolation

Sense of being a burden or insufficiency

Changes in identity

Measured by

**Operationalizations of existential distress**

Death anxiety

Perceived relatedness

Dignity-related distress

End-of-life preparation

Caregiver guilt

Anticipatory grief

Demoralization

Predicts

**End-of-life outcomes**

Aggressiveness of care

Mental disorders

Suicidal ideation and behavior

Complicated grief
